# Supplementary material
Source: publisher figshare collection journal article supplement (https://acs.figshare.com/ndownloader/files/10290810)
Supplement: Supplementary file 1 [file 10290810]

data_General
_audit_creation_date                  '2016-10-20'
_audit_creation_method                'by CrystalStructure 3.6.0'
_audit_update_record                   ?

#==============================================================================

# PROCESSING SUMMARY (IUCr Office Use Only)

_journal_date_recd_electronic     ?
_journal_date_from_coeditor       ?
_journal_date_accepted            ?
_journal_coeditor_code            ?

#==============================================================================

# SUBMISSION DETAILS

_publ_contact_author_name             'Jian-Ping Lang'
_publ_contact_author_address
;
 College of Chemistry, Chemical Engineering and Materials Science
 Soochow University
 Suzhou 215123, Jiangsu
 P.R.China
;
_publ_contact_author_email            'jplang@suda.edu.cn'
_publ_contact_author_fax              '86-512-65880328'
_publ_contact_author_phone            '86-512-65882865'
_publ_contact_letter
;
    ENTER TEXT OF LETTER
;
_publ_requested_journal               'J. Org. Chem.'
_publ_requested_category              'FM'
_publ_requested_coeditor_name          ?

#==============================================================================

# TITLE AND AUTHOR LIST

_publ_section_title
;
    ENTER SECTION TITLE
;
_publ_section_title_footnote
;
    ENTER FOOTNOTE TO TITLE OF PAPER
;
loop_
_publ_author_name
_publ_author_footnote
_publ_author_address
' FIRST AUTHORS NAME '
;
  FIRST AUTHORS FOOTNOTES
;
;
  FIRST AUTHORS ADDRESS
;
_publ_section_synopsis
;
  ENTER SYNOPSIS
;

#==============================================================================

# TEXT

_publ_section_abstract
;
    ENTER ABSTRACT
;
_publ_section_comment
;
    ENTER TEXT
;
_publ_section_references
;
    ENTER OTHER REFERENCES

    Rigaku/MSC and Rigaku Corporation. (2004).
    CrystalStructure 3.6.0.
    Single Crystal Structure Analysis Software.
    Rigaku/MSC, 9009 New Trails Drive, The Woodlands, TX, USA 77381-5209.
    Rigaku, 3-9-12 Akishima, Tokyo 196-8666, Japan.

    Watkin, D.J., Prout, C.K. Carruthers, J.R. & Betteridge, P.W. (1996)
    CRYSTALS Issue 10, Chemical Crystallography Laboratory, Oxford, UK.

;
_publ_section_figure_captions
;
    ENTER FIGURE CAPTIONS
;
_publ_section_exptl_prep
;
    ENTER COMPOUND PREPARATION DETAILS
;
_publ_section_exptl_refinement
;
    ENTER SPECIAL DETAILS OF THE REFINEMENT
;      

data_1g 
 
_audit_creation_method            SHELXL-97 
_chemical_name_systematic 
; 
 ? 
; 
_chemical_name_common             ? 
_chemical_melting_point           ? 
_chemical_formula_moiety         
 'C70 H66 Cu6 N14 O3 S6' 
_chemical_formula_sum 
 'C70 H66 Cu6 N14 O3 S6' 
_chemical_formula_weight          1724.97 
 
loop_ 
 _atom_type_symbol 
 _atom_type_description 
 _atom_type_scat_dispersion_real 
 _atom_type_scat_dispersion_imag 
 _atom_type_scat_source 
 'C'  'C'   0.0033   0.0016 
 'International Tables Vol C Tables 4.2.6.8 and 6.1.1.4' 
 'H'  'H'   0.0000   0.0000 
 'International Tables Vol C Tables 4.2.6.8 and 6.1.1.4' 
 'N'  'N'   0.0061   0.0033 
 'International Tables Vol C Tables 4.2.6.8 and 6.1.1.4' 
 'O'  'O'   0.0106   0.0060 
 'International Tables Vol C Tables 4.2.6.8 and 6.1.1.4' 
 'S'  'S'   0.1246   0.1234 
 'International Tables Vol C Tables 4.2.6.8 and 6.1.1.4' 
 'Cu'  'Cu'   0.3201   1.2651 
 'International Tables Vol C Tables 4.2.6.8 and 6.1.1.4' 
 
_symmetry_cell_setting            monoclinic 
_symmetry_space_group_name_H-M    'P 21' 
_symmetry_space_group_name_Hall    'P 2yb'
 
loop_ 
 _symmetry_equiv_pos_as_xyz 
 'x, y, z' 
 '-x, y+1/2, -z' 
 
_cell_length_a                    12.720(3) 
_cell_length_b                    21.862(4) 
_cell_length_c                    13.524(3) 
_cell_angle_alpha                 90.00 
_cell_angle_beta                  108.38(3) 
_cell_angle_gamma                 90.00 
_cell_volume                      3569.0(12) 
_cell_formula_units_Z             2 
_cell_measurement_temperature     193(2) 
_cell_measurement_reflns_used     14857 
_cell_measurement_theta_min       3.0900
_cell_measurement_theta_max       27.5165 
 
_exptl_crystal_description        'Block' 
_exptl_crystal_colour             'Yellow' 
_exptl_crystal_size_max           0.40 
_exptl_crystal_size_mid           0.35 
_exptl_crystal_size_min           0.23 
_exptl_crystal_density_meas       ? 
_exptl_crystal_density_diffrn     1.605 
_exptl_crystal_density_method     'not measured' 
_exptl_crystal_F_000              1756 
_exptl_absorpt_coefficient_mu     1.989 
_exptl_absorpt_correction_type    Multi-scan
_exptl_absorpt_correction_T_min   0.5034 
_exptl_absorpt_correction_T_max   0.6577 
_exptl_absorpt_process_details    
'Jacobson, R. (1998) Private communication' 
 
_exptl_special_details 
; 
 ? 
; 
 
_diffrn_ambient_temperature       193(2) 
_diffrn_radiation_wavelength      0.71073 
_diffrn_radiation_type            MoK\a 
_diffrn_radiation_source          'fine-focus sealed tube' 
_diffrn_radiation_monochromator   graphite 
_diffrn_measurement_device_type   'Rigaku Saturn'
_diffrn_measurement_method         \w 
_diffrn_detector_area_resol_mean  0 
_diffrn_standards_number          0 
_diffrn_standards_interval_count  0 
_diffrn_standards_interval_time   0 
_diffrn_standards_decay_%         0 
_diffrn_reflns_number             19541 
_diffrn_reflns_av_R_equivalents   0.0306 
_diffrn_reflns_av_sigmaI/netI     0.0663 
_diffrn_reflns_limit_h_min        -15 
_diffrn_reflns_limit_h_max        16 
_diffrn_reflns_limit_k_min        -28 
_diffrn_reflns_limit_k_max        27 
_diffrn_reflns_limit_l_min        -13 
_diffrn_reflns_limit_l_max        17 
_diffrn_reflns_theta_min          3.09 
_diffrn_reflns_theta_max          27.47 
_reflns_number_total              14181 
_reflns_number_gt                 12426 
_reflns_threshold_expression      >2sigma(I) 
 
_computing_data_collection        'CrystalClear'
_computing_cell_refinement        'CrystalClear'
_computing_data_reduction         'CrystalStructure' 
_computing_structure_solution     'SHELXS-97 (Sheldrick, 1990)' 
_computing_structure_refinement   'SHELXL-97 (Sheldrick, 1997)' 
_computing_molecular_graphics     ? 
_computing_publication_material   ? 
 
_refine_special_details 
; 
 Refinement of F^2^ against ALL reflections.  The weighted R-factor wR and 
 goodness of fit S are based on F^2^, conventional R-factors R are based 
 on F, with F set to zero for negative F^2^. The threshold expression of 
 F^2^ > 2sigma(F^2^) is used only for calculating R-factors(gt) etc. and is 
 not relevant to the choice of reflections for refinement.  R-factors based 
 on F^2^ are statistically about twice as large as those based on F, and R- 
 factors based on ALL data will be even larger. 
; 
 
_refine_ls_structure_factor_coef  Fsqd  
_refine_ls_matrix_type            full 
_refine_ls_weighting_scheme       calc  
_refine_ls_weighting_details 
 'calc w=1/[\s^2^(Fo^2^)+(0.0574P)^2^+0.0000P] where P=(Fo^2^+2Fc^2^)/3' 
_atom_sites_solution_primary      direct 
_atom_sites_solution_secondary    difmap 
_atom_sites_solution_hydrogens    geom 
_refine_ls_hydrogen_treatment     constr
_refine_ls_extinction_method      none 
_refine_ls_extinction_coef        ? 
_refine_ls_abs_structure_details 
 'Flack H D (1983), Acta Cryst. A39, 876-881' 
_refine_ls_abs_structure_Flack    0.278(12) 
_refine_ls_number_reflns          14181 
_refine_ls_number_parameters      817 
_refine_ls_number_restraints      1 
_refine_ls_R_factor_all           0.0628 
_refine_ls_R_factor_gt            0.0542 
_refine_ls_wR_factor_ref          0.1302 
_refine_ls_wR_factor_gt           0.1222 
_refine_ls_goodness_of_fit_ref    1.078 
_refine_ls_restrained_S_all       1.078 
_refine_ls_shift/su_max           0.001 
_refine_ls_shift/su_mean          0.000 
 
loop_ 
 _atom_site_label 
 _atom_site_type_symbol 
 _atom_site_fract_x 
 _atom_site_fract_y 
 _atom_site_fract_z 
 _atom_site_U_iso_or_equiv 
 _atom_site_adp_type 
 _atom_site_occupancy 
 _atom_site_symmetry_multiplicity 
 _atom_site_calc_flag 
 _atom_site_refinement_flags 
 _atom_site_disorder_assembly 
 _atom_site_disorder_group 
Cu1 Cu 0.56522(6) 0.39287(3) 0.01779(5) 0.03461(16) Uani 1 1 d . . . 
Cu2 Cu 0.48380(6) 0.39241(3) -0.20927(5) 0.03549(16) Uani 1 1 d . . . 
Cu3 Cu 0.60395(6) 0.29564(3) -0.09773(5) 0.03368(17) Uani 1 1 d . . . 
Cu4 Cu 0.71386(6) 0.38596(3) -0.21762(6) 0.03520(17) Uani 1 1 d . . . 
Cu5 Cu 0.80050(6) 0.39579(3) 0.02303(6) 0.03621(17) Uani 1 1 d . . . 
Cu6 Cu 0.68192(6) 0.48802(4) -0.10741(6) 0.03557(17) Uani 1 1 d . . . 
S1 S 0.39552(12) 0.37406(6) -0.09299(12) 0.0321(3) Uani 1 1 d . . . 
S2 S 0.75341(11) 0.29803(7) 0.04579(11) 0.0305(3) Uani 1 1 d . . . 
S3 S 0.62951(11) 0.49064(7) 0.03621(11) 0.0301(3) Uani 1 1 d . . . 
S4 S 0.87942(11) 0.40320(7) -0.10160(11) 0.0313(3) Uani 1 1 d . . . 
S5 S 0.52700(11) 0.48856(7) -0.24673(11) 0.0324(3) Uani 1 1 d . . . 
S6 S 0.64679(12) 0.28915(7) -0.24735(11) 0.0323(3) Uani 1 1 d . . . 
N1 N 0.4609(4) 0.2576(2) -0.0954(4) 0.0332(11) Uani 1 1 d . . . 
N2 N 0.2739(4) 0.2748(2) -0.0957(4) 0.0302(10) Uani 1 1 d . . . 
N3 N 0.6254(4) 0.3428(2) 0.1504(4) 0.0336(11) Uani 1 1 d . . . 
N4 N 0.7682(4) 0.2737(2) 0.2422(4) 0.0328(11) Uani 1 1 d . . . 
N5 N 0.8279(4) 0.4494(2) 0.1509(4) 0.0332(11) Uani 1 1 d . . . 
N6 N 0.7408(4) 0.5230(2) 0.2286(4) 0.0356(11) Uani 1 1 d . . . 
N7 N 0.8257(4) 0.5222(2) -0.1180(4) 0.0320(10) Uani 1 1 d . . . 
N8 N 1.0096(4) 0.4961(2) -0.1086(4) 0.0320(11) Uani 1 1 d . . . 
N9 N 0.6527(4) 0.4365(2) -0.3478(4) 0.0338(11) Uani 1 1 d . . . 
N10 N 0.5168(4) 0.5081(2) -0.4439(4) 0.0336(11) Uani 1 1 d . . . 
N11 N 0.4542(4) 0.3428(2) -0.3430(4) 0.0384(12) Uani 1 1 d . . . 
N12 N 0.5187(4) 0.2719(2) -0.4424(4) 0.0336(11) Uani 1 1 d . . . 
N13 N 1.0440(6) 0.3400(3) -0.3810(6) 0.0682(19) Uiso 1 1 d . . . 
N14 N 0.2109(7) 0.5189(4) -0.4302(7) 0.080(2) Uiso 1 1 d . . . 
O1 O 0.8980(5) 0.3885(3) -0.4944(5) 0.0830(17) Uiso 1 1 d . . . 
O2 O 0.1679(7) 0.4447(4) -0.5513(7) 0.108(2) Uiso 1 1 d . . . 
O3 O 0.1411(5) 0.3659(3) -0.7909(5) 0.0675(15) Uiso 1 1 d . . . 
C1 C 0.3750(4) 0.2950(3) -0.0943(4) 0.0289(11) Uani 1 1 d . . . 
C2 C 0.4392(5) 0.1970(3) -0.0997(5) 0.0382(14) Uani 1 1 d . . . 
H2B H 0.4962 0.1694 -0.1014 0.046 Uiso 1 1 calc R . . 
C3 C 0.3383(6) 0.1733(3) -0.1017(6) 0.0437(16) Uani 1 1 d . . . 
H3A H 0.3255 0.1304 -0.1048 0.052 Uiso 1 1 calc R . . 
C4 C 0.2561(5) 0.2143(3) -0.0992(5) 0.0335(13) Uani 1 1 d . . . 
C5 C 0.1422(5) 0.1952(3) -0.1039(4) 0.0366(14) Uani 1 1 d . . . 
C6 C 0.1076(6) 0.1338(3) -0.1261(6) 0.0491(17) Uani 1 1 d . . . 
H6B H 0.1577 0.1041 -0.1364 0.059 Uiso 1 1 calc R . . 
C7 C -0.0001(6) 0.1169(4) -0.1327(6) 0.060(2) Uani 1 1 d . . . 
H7A H -0.0239 0.0760 -0.1498 0.072 Uiso 1 1 calc R . . 
C8 C -0.0722(6) 0.1594(4) -0.1148(6) 0.057(2) Uani 1 1 d . . . 
H8B H -0.1442 0.1469 -0.1161 0.068 Uiso 1 1 calc R . . 
C9 C -0.0410(6) 0.2202(4) -0.0948(6) 0.056(2) Uani 1 1 d . . . 
H9A H -0.0920 0.2497 -0.0857 0.067 Uiso 1 1 calc R . . 
C10 C 0.0681(6) 0.2371(3) -0.0882(5) 0.0458(16) Uani 1 1 d . . . 
H10B H 0.0910 0.2783 -0.0726 0.055 Uiso 1 1 calc R . . 
C11 C 0.7121(4) 0.3062(3) 0.1582(4) 0.0306(12) Uani 1 1 d . . . 
C12 C 0.5954(6) 0.3495(3) 0.2383(5) 0.0424(15) Uani 1 1 d . . . 
H12B H 0.5366 0.3764 0.2378 0.051 Uiso 1 1 calc R . . 
C13 C 0.6502(5) 0.3173(3) 0.3284(5) 0.0418(15) Uani 1 1 d . . . 
H13A H 0.6275 0.3208 0.3887 0.050 Uiso 1 1 calc R . . 
C14 C 0.7386(5) 0.2799(3) 0.3289(4) 0.0310(12) Uani 1 1 d . . . 
C15 C 0.8049(5) 0.2458(3) 0.4222(5) 0.0415(15) Uani 1 1 d . . . 
C16 C 0.8952(6) 0.2122(4) 0.4186(6) 0.058(2) Uani 1 1 d . . . 
H16A H 0.9132 0.2112 0.3556 0.070 Uiso 1 1 calc R . . 
C17 C 0.9605(7) 0.1799(4) 0.5037(7) 0.077(3) Uani 1 1 d . . . 
H17A H 1.0219 0.1566 0.4992 0.092 Uiso 1 1 calc R . . 
C18 C 0.9335(7) 0.1823(5) 0.5982(7) 0.076(3) Uani 1 1 d . . . 
H18A H 0.9782 0.1613 0.6583 0.092 Uiso 1 1 calc R . . 
C19 C 0.8450(7) 0.2142(5) 0.6021(6) 0.062(2) Uani 1 1 d . . . 
H19A H 0.8270 0.2153 0.6651 0.075 Uiso 1 1 calc R . . 
C20 C 0.7786(6) 0.2460(3) 0.5146(5) 0.0472(17) Uani 1 1 d . . . 
H20A H 0.7153 0.2677 0.5185 0.057 Uiso 1 1 calc R . . 
C21 C 0.7448(5) 0.4877(3) 0.1495(4) 0.0311(12) Uani 1 1 d . . . 
C22 C 0.9126(5) 0.4476(3) 0.2400(5) 0.0422(15) Uani 1 1 d . . . 
H22A H 0.9737 0.4219 0.2429 0.051 Uiso 1 1 calc R . . 
C23 C 0.9163(5) 0.4800(3) 0.3262(5) 0.0468(16) Uani 1 1 d . . . 
H23A H 0.9767 0.4767 0.3889 0.056 Uiso 1 1 calc R . . 
C24 C 0.8262(5) 0.5188(3) 0.3181(5) 0.0367(13) Uani 1 1 d . . . 
C25 C 0.8154(5) 0.5560(3) 0.4077(5) 0.0420(15) Uani 1 1 d . . . 
C26 C 0.8731(7) 0.5395(4) 0.5119(6) 0.067(2) Uani 1 1 d . . . 
H26A H 0.9218 0.5054 0.5262 0.080 Uiso 1 1 calc R . . 
C27 C 0.8584(9) 0.5727(5) 0.5910(7) 0.082(3) Uani 1 1 d . . . 
H27A H 0.8986 0.5616 0.6606 0.099 Uiso 1 1 calc R . . 
C28 C 0.7884(8) 0.6209(5) 0.5745(7) 0.075(3) Uani 1 1 d . . . 
H28A H 0.7774 0.6422 0.6317 0.090 Uiso 1 1 calc R . . 
C29 C 0.7330(7) 0.6387(4) 0.4727(7) 0.068(2) Uani 1 1 d . . . 
H29A H 0.6860 0.6735 0.4608 0.081 Uiso 1 1 calc R . . 
C30 C 0.7448(6) 0.6070(3) 0.3889(5) 0.0486(17) Uani 1 1 d . . . 
H30A H 0.7059 0.6194 0.3196 0.058 Uiso 1 1 calc R . . 
C31 C 0.9075(4) 0.4816(3) -0.1101(4) 0.0325(13) Uani 1 1 d . . . 
C32 C 0.8499(5) 0.5810(3) -0.1287(5) 0.0361(13) Uani 1 1 d . . . 
H32A H 0.7932 0.6108 -0.1379 0.043 Uiso 1 1 calc R . . 
C33 C 0.9528(5) 0.5997(3) -0.1269(5) 0.0366(14) Uani 1 1 d . . . 
H33A H 0.9682 0.6417 -0.1339 0.044 Uiso 1 1 calc R . . 
C34 C 1.0345(5) 0.5556(3) -0.1147(4) 0.0297(12) Uani 1 1 d . . . 
C35 C 1.1516(5) 0.5695(3) -0.1095(4) 0.0326(13) Uani 1 1 d . . . 
C36 C 1.1897(5) 0.6282(3) -0.1168(6) 0.0454(16) Uani 1 1 d . . . 
H36A H 1.1402 0.6618 -0.1268 0.055 Uiso 1 1 calc R . . 
C37 C 1.2974(6) 0.6379(3) -0.1098(7) 0.0530(19) Uani 1 1 d . . . 
H37A H 1.3219 0.6785 -0.1143 0.064 Uiso 1 1 calc R . . 
C38 C 1.3701(6) 0.5918(3) -0.0967(6) 0.0446(16) Uani 1 1 d . . . 
H38A H 1.4443 0.5998 -0.0940 0.053 Uiso 1 1 calc R . . 
C39 C 1.3366(5) 0.5321(3) -0.0870(6) 0.0474(17) Uani 1 1 d . . . 
H39A H 1.3879 0.4994 -0.0766 0.057 Uiso 1 1 calc R . . 
C40 C 1.2271(5) 0.5209(3) -0.0927(6) 0.0437(16) Uani 1 1 d . . . 
H40A H 1.2037 0.4804 -0.0851 0.052 Uiso 1 1 calc R . . 
C41 C 0.5696(5) 0.4770(3) -0.3572(4) 0.0318(12) Uani 1 1 d . . . 
C42 C 0.6810(5) 0.4271(3) -0.4347(5) 0.0372(14) Uani 1 1 d . . . 
H42A H 0.7373 0.3980 -0.4322 0.045 Uiso 1 1 calc R . . 
C43 C 0.6327(5) 0.4575(3) -0.5265(5) 0.0407(15) Uani 1 1 d . . . 
H43A H 0.6556 0.4510 -0.5861 0.049 Uiso 1 1 calc R . . 
C44 C 0.5482(5) 0.4984(3) -0.5278(4) 0.0323(12) Uani 1 1 d . . . 
C45 C 0.4878(5) 0.5350(3) -0.6226(5) 0.0356(13) Uani 1 1 d . . . 
C46 C 0.4230(6) 0.5835(3) -0.6140(5) 0.0479(17) Uani 1 1 d . . . 
H46A H 0.4145 0.5928 -0.5484 0.057 Uiso 1 1 calc R . . 
C47 C 0.3699(7) 0.6194(4) -0.6998(6) 0.059(2) Uani 1 1 d . . . 
H47A H 0.3265 0.6534 -0.6926 0.071 Uiso 1 1 calc R . . 
C48 C 0.3803(6) 0.6053(4) -0.7958(6) 0.057(2) Uani 1 1 d . . . 
H48A H 0.3409 0.6283 -0.8556 0.069 Uiso 1 1 calc R . . 
C49 C 0.4473(6) 0.5582(4) -0.8047(6) 0.055(2) Uani 1 1 d . . . 
H49A H 0.4559 0.5496 -0.8705 0.066 Uiso 1 1 calc R . . 
C50 C 0.5032(5) 0.5227(3) -0.7190(5) 0.0430(15) Uani 1 1 d . . . 
H50A H 0.5511 0.4906 -0.7256 0.052 Uiso 1 1 calc R . . 
C51 C 0.5260(5) 0.3020(3) -0.3542(4) 0.0325(12) Uani 1 1 d . . . 
C52 C 0.3652(5) 0.3564(3) -0.4291(5) 0.0455(16) Uani 1 1 d . . . 
H52A H 0.3116 0.3852 -0.4231 0.055 Uiso 1 1 calc R . . 
C53 C 0.3529(5) 0.3295(3) -0.5217(5) 0.0466(16) Uani 1 1 d . . . 
H53A H 0.2934 0.3406 -0.5816 0.056 Uiso 1 1 calc R . . 
C54 C 0.4289(5) 0.2854(3) -0.5279(4) 0.0379(14) Uani 1 1 d . . . 
C55 C 0.4229(5) 0.2512(3) -0.6250(5) 0.0430(15) Uani 1 1 d . . . 
C56 C 0.4775(7) 0.1963(3) -0.6203(6) 0.0529(18) Uani 1 1 d . . . 
H56A H 0.5202 0.1807 -0.5543 0.064 Uiso 1 1 calc R . . 
C57 C 0.4715(7) 0.1629(4) -0.7100(7) 0.068(2) Uani 1 1 d . . . 
H57A H 0.5086 0.1248 -0.7055 0.082 Uiso 1 1 calc R . . 
C58 C 0.4111(7) 0.1863(5) -0.8042(7) 0.074(3) Uani 1 1 d . . . 
H58A H 0.4043 0.1637 -0.8659 0.089 Uiso 1 1 calc R . . 
C59 C 0.3591(7) 0.2432(5) -0.8115(6) 0.078(3) Uani 1 1 d . . . 
H59A H 0.3213 0.2601 -0.8780 0.093 Uiso 1 1 calc R . . 
C60 C 0.3625(6) 0.2750(4) -0.7218(6) 0.060(2) Uani 1 1 d . . . 
H60A H 0.3239 0.3127 -0.7263 0.072 Uiso 1 1 calc R . . 
C61 C 0.9840(7) 0.3568(4) -0.4749(8) 0.070(2) Uiso 1 1 d . . . 
H61A H 1.0074 0.3441 -0.5318 0.084 Uiso 1 1 calc R . . 
C62 C 1.0167(11) 0.3622(6) -0.2910(10) 0.114(4) Uiso 1 1 d . . . 
H62A H 0.9517 0.3890 -0.3142 0.171 Uiso 1 1 calc R . . 
H62B H 1.0796 0.3853 -0.2457 0.171 Uiso 1 1 calc R . . 
H62C H 1.0004 0.3275 -0.2525 0.171 Uiso 1 1 calc R . . 
C63 C 1.1385(8) 0.3011(5) -0.3627(8) 0.091(3) Uiso 1 1 d . . . 
H63A H 1.1491 0.2905 -0.4294 0.137 Uiso 1 1 calc R . . 
H63B H 1.1268 0.2636 -0.3277 0.137 Uiso 1 1 calc R . . 
H63C H 1.2044 0.3224 -0.3186 0.137 Uiso 1 1 calc R . . 
C64 C 0.2068(9) 0.4981(5) -0.5227(9) 0.090(3) Uiso 1 1 d . . . 
H64A H 0.2326 0.5227 -0.5682 0.108 Uiso 1 1 calc R . . 
C65 C 0.2630(11) 0.5800(6) -0.3972(11) 0.122(4) Uiso 1 1 d . . . 
H65A H 0.2823 0.5987 -0.4550 0.184 Uiso 1 1 calc R . . 
H65B H 0.3302 0.5748 -0.3374 0.184 Uiso 1 1 calc R . . 
H65C H 0.2107 0.6064 -0.3773 0.184 Uiso 1 1 calc R . . 
C66 C 0.1789(10) 0.4852(6) -0.3588(10) 0.106(4) Uiso 1 1 d . . . 
H66A H 0.1481 0.4460 -0.3900 0.158 Uiso 1 1 calc R . . 
H66B H 0.1226 0.5078 -0.3383 0.158 Uiso 1 1 calc R . . 
H66C H 0.2433 0.4777 -0.2973 0.158 Uiso 1 1 calc R . . 
C67 C 0.2119(16) 0.4573(9) -0.8108(15) 0.188(8) Uiso 1 1 d . . . 
H67A H 0.2294 0.4857 -0.8595 0.281 Uiso 1 1 calc R . . 
H67B H 0.2799 0.4467 -0.7550 0.281 Uiso 1 1 calc R . . 
H67C H 0.1595 0.4767 -0.7807 0.281 Uiso 1 1 calc R . . 
C68 C 0.1639(10) 0.4036(6) -0.8646(10) 0.106(4) Uiso 1 1 d . . . 
H68A H 0.0950 0.4134 -0.9213 0.127 Uiso 1 1 calc R . . 
H68B H 0.2160 0.3832 -0.8951 0.127 Uiso 1 1 calc R . . 
C69 C 0.0795(8) 0.3118(4) -0.8339(7) 0.073(2) Uiso 1 1 d . . . 
H69A H 0.1219 0.2868 -0.8692 0.087 Uiso 1 1 calc R . . 
H69B H 0.0082 0.3233 -0.8859 0.087 Uiso 1 1 calc R . . 
C70 C 0.0582(9) 0.2749(5) -0.7470(9) 0.094(3) Uiso 1 1 d . . . 
H70A H 0.0161 0.2380 -0.7762 0.140 Uiso 1 1 calc R . . 
H70B H 0.0157 0.2996 -0.7126 0.140 Uiso 1 1 calc R . . 
H70C H 0.1291 0.2631 -0.6961 0.140 Uiso 1 1 calc R . . 
 
loop_ 
 _atom_site_aniso_label 
 _atom_site_aniso_U_11 
 _atom_site_aniso_U_22 
 _atom_site_aniso_U_33 
 _atom_site_aniso_U_23 
 _atom_site_aniso_U_13 
 _atom_site_aniso_U_12 
Cu1 0.0340(4) 0.0310(4) 0.0332(4) -0.0021(3) 0.0026(3) 0.0014(3) 
Cu2 0.0414(4) 0.0334(4) 0.0320(4) 0.0010(3) 0.0121(3) 0.0008(3) 
Cu3 0.0328(4) 0.0381(4) 0.0290(4) -0.0023(3) 0.0081(3) 0.0007(3) 
Cu4 0.0342(4) 0.0323(4) 0.0338(4) -0.0007(3) 0.0032(3) 0.0007(3) 
Cu5 0.0443(4) 0.0315(4) 0.0366(4) 0.0019(3) 0.0182(3) 0.0034(3) 
Cu6 0.0333(4) 0.0424(4) 0.0288(4) -0.0010(3) 0.0066(3) 0.0036(3) 
S1 0.0319(7) 0.0284(7) 0.0338(7) -0.0019(5) 0.0074(6) -0.0015(6) 
S2 0.0332(7) 0.0303(7) 0.0267(7) 0.0013(6) 0.0076(5) 0.0022(6) 
S3 0.0321(7) 0.0286(7) 0.0279(7) -0.0035(6) 0.0071(5) 0.0013(6) 
S4 0.0297(7) 0.0334(8) 0.0302(7) -0.0011(6) 0.0084(5) 0.0013(6) 
S5 0.0343(7) 0.0331(7) 0.0270(7) 0.0030(6) 0.0059(6) 0.0031(7) 
S6 0.0402(8) 0.0280(7) 0.0278(7) -0.0037(6) 0.0095(6) -0.0007(6) 
N1 0.035(3) 0.029(2) 0.037(3) -0.001(2) 0.014(2) 0.002(2) 
N2 0.032(2) 0.031(3) 0.027(2) -0.0027(19) 0.009(2) 0.002(2) 
N3 0.033(2) 0.028(2) 0.038(3) 0.002(2) 0.009(2) 0.001(2) 
N4 0.031(2) 0.037(3) 0.031(3) -0.001(2) 0.009(2) -0.001(2) 
N5 0.032(3) 0.037(3) 0.029(3) -0.003(2) 0.006(2) 0.006(2) 
N6 0.035(3) 0.040(3) 0.028(3) -0.001(2) 0.003(2) -0.007(2) 
N7 0.034(2) 0.034(3) 0.027(2) 0.000(2) 0.008(2) 0.001(2) 
N8 0.035(2) 0.033(3) 0.028(2) 0.001(2) 0.010(2) -0.003(2) 
N9 0.031(3) 0.033(3) 0.036(3) 0.003(2) 0.008(2) 0.004(2) 
N10 0.038(3) 0.030(3) 0.030(3) 0.002(2) 0.008(2) -0.001(2) 
N11 0.040(3) 0.041(3) 0.032(3) -0.002(2) 0.009(2) 0.003(2) 
N12 0.034(3) 0.039(3) 0.027(3) -0.006(2) 0.009(2) 0.003(2) 
C1 0.029(3) 0.029(3) 0.027(3) -0.001(2) 0.005(2) -0.003(2) 
C2 0.037(3) 0.037(3) 0.041(4) 0.002(3) 0.013(3) 0.004(3) 
C3 0.053(4) 0.027(3) 0.050(4) -0.004(3) 0.013(3) 0.001(3) 
C4 0.042(3) 0.032(3) 0.028(3) 0.002(2) 0.014(3) -0.005(3) 
C5 0.036(3) 0.043(4) 0.029(3) 0.005(3) 0.007(3) -0.011(3) 
C6 0.055(4) 0.045(4) 0.048(4) -0.001(3) 0.016(3) -0.008(3) 
C7 0.062(5) 0.065(5) 0.048(4) 0.001(4) 0.010(4) -0.035(4) 
C8 0.045(4) 0.086(6) 0.037(4) 0.009(4) 0.011(3) -0.018(4) 
C9 0.032(3) 0.080(6) 0.057(5) 0.002(4) 0.016(3) 0.004(4) 
C10 0.047(4) 0.049(4) 0.044(4) 0.004(3) 0.019(3) -0.009(3) 
C11 0.031(3) 0.026(3) 0.033(3) 0.000(2) 0.007(2) 0.001(2) 
C12 0.048(4) 0.045(4) 0.039(4) 0.002(3) 0.020(3) 0.009(3) 
C13 0.045(3) 0.048(4) 0.032(3) -0.008(3) 0.013(3) 0.005(3) 
C14 0.034(3) 0.031(3) 0.028(3) 0.000(2) 0.010(2) -0.004(2) 
C15 0.036(3) 0.054(4) 0.031(3) 0.010(3) 0.006(3) 0.010(3) 
C16 0.058(4) 0.079(6) 0.035(4) 0.017(4) 0.011(3) 0.015(4) 
C17 0.069(5) 0.086(7) 0.071(6) 0.037(5) 0.018(5) 0.038(5) 
C18 0.067(5) 0.103(8) 0.050(5) 0.037(5) 0.006(4) 0.013(5) 
C19 0.057(5) 0.092(7) 0.038(5) 0.023(4) 0.016(4) 0.002(5) 
C20 0.055(4) 0.059(4) 0.030(3) 0.006(3) 0.017(3) -0.001(4) 
C21 0.038(3) 0.027(3) 0.029(3) -0.003(2) 0.011(2) 0.002(3) 
C22 0.034(3) 0.044(4) 0.042(4) 0.003(3) 0.003(3) 0.003(3) 
C23 0.043(3) 0.055(4) 0.037(4) -0.009(3) 0.004(3) 0.005(3) 
C24 0.036(3) 0.042(3) 0.028(3) -0.008(3) 0.005(2) -0.005(3) 
C25 0.041(3) 0.051(4) 0.031(3) -0.014(3) 0.007(3) -0.013(3) 
C26 0.079(6) 0.074(6) 0.036(4) -0.004(4) 0.003(4) 0.000(5) 
C27 0.108(8) 0.098(8) 0.028(4) -0.024(4) 0.003(5) -0.003(6) 
C28 0.086(6) 0.098(7) 0.043(5) -0.028(5) 0.022(5) -0.010(6) 
C29 0.073(5) 0.078(6) 0.053(5) -0.028(4) 0.019(4) -0.013(5) 
C30 0.049(4) 0.056(4) 0.038(4) -0.021(3) 0.009(3) -0.007(3) 
C31 0.027(3) 0.045(3) 0.023(3) 0.000(2) 0.003(2) 0.009(3) 
C32 0.044(3) 0.029(3) 0.032(3) 0.004(2) 0.007(3) 0.003(3) 
C33 0.045(3) 0.031(3) 0.033(3) 0.001(2) 0.012(3) -0.004(3) 
C34 0.030(3) 0.026(3) 0.028(3) 0.001(2) 0.002(2) -0.003(2) 
C35 0.036(3) 0.029(3) 0.029(3) -0.002(2) 0.005(2) 0.003(2) 
C36 0.038(3) 0.034(3) 0.064(5) 0.008(3) 0.015(3) 0.006(3) 
C37 0.054(4) 0.030(3) 0.081(6) 0.005(3) 0.031(4) -0.001(3) 
C38 0.043(4) 0.037(4) 0.054(4) -0.003(3) 0.016(3) -0.009(3) 
C39 0.036(3) 0.039(4) 0.063(5) 0.002(3) 0.009(3) 0.009(3) 
C40 0.040(3) 0.032(3) 0.060(4) -0.003(3) 0.017(3) -0.008(3) 
C41 0.031(3) 0.033(3) 0.026(3) 0.005(2) 0.002(2) 0.006(2) 
C42 0.041(3) 0.038(3) 0.035(3) -0.005(3) 0.016(3) 0.006(3) 
C43 0.049(4) 0.044(4) 0.032(3) 0.003(3) 0.017(3) 0.006(3) 
C44 0.040(3) 0.033(3) 0.022(3) 0.003(2) 0.006(2) 0.000(3) 
C45 0.038(3) 0.039(3) 0.028(3) 0.005(2) 0.009(3) -0.001(3) 
C46 0.056(4) 0.059(4) 0.029(3) 0.011(3) 0.014(3) 0.013(4) 
C47 0.063(5) 0.065(5) 0.055(5) 0.020(4) 0.025(4) 0.025(4) 
C48 0.046(4) 0.073(5) 0.057(5) 0.029(4) 0.021(4) 0.005(4) 
C49 0.062(5) 0.078(5) 0.028(4) 0.014(3) 0.016(3) 0.003(4) 
C50 0.043(3) 0.054(4) 0.032(3) 0.006(3) 0.011(3) 0.000(3) 
C51 0.034(3) 0.033(3) 0.028(3) -0.003(2) 0.007(2) -0.006(3) 
C52 0.042(3) 0.047(4) 0.043(4) -0.008(3) 0.006(3) 0.008(3) 
C53 0.036(3) 0.059(4) 0.041(4) -0.006(3) 0.007(3) 0.009(3) 
C54 0.037(3) 0.048(4) 0.024(3) -0.005(3) 0.003(2) -0.006(3) 
C55 0.036(3) 0.055(4) 0.040(4) -0.013(3) 0.013(3) -0.002(3) 
C56 0.069(5) 0.052(4) 0.037(4) -0.009(3) 0.014(3) 0.007(4) 
C57 0.071(5) 0.070(5) 0.057(5) -0.025(4) 0.010(4) 0.011(4) 
C58 0.066(5) 0.112(8) 0.041(5) -0.036(5) 0.013(4) 0.005(5) 
C59 0.057(5) 0.136(9) 0.030(4) -0.016(5) 0.000(3) 0.030(6) 
C60 0.043(4) 0.093(6) 0.036(4) -0.012(4) 0.001(3) 0.012(4) 
 
_geom_special_details 
; 
 All esds (except the esd in the dihedral angle between two l.s. planes) 
 are estimated using the full covariance matrix.  The cell esds are taken 
 into account individually in the estimation of esds in distances, angles 
 and torsion angles; correlations between esds in cell parameters are only 
 used when they are defined by crystal symmetry.  An approximate (isotropic) 
 treatment of cell esds is used for estimating esds involving l.s. planes. 
; 
 
loop_ 
 _geom_bond_atom_site_label_1 
 _geom_bond_atom_site_label_2 
 _geom_bond_distance 
 _geom_bond_site_symmetry_2 
 _geom_bond_publ_flag 
Cu1 N3 2.033(5) . ? 
Cu1 S1 2.2437(18) . ? 
Cu1 S3 2.2739(17) . ? 
Cu1 Cu3 2.7726(11) . ? 
Cu1 Cu2 2.9149(12) . ? 
Cu1 Cu5 2.9720(11) . ? 
Cu2 N11 2.039(5) . ? 
Cu2 S1 2.2380(17) . ? 
Cu2 S5 2.2700(18) . ? 
Cu2 Cu3 2.7628(12) . ? 
Cu2 Cu4 2.9672(11) . ? 
Cu3 N1 2.010(5) . ? 
Cu3 S2 2.2489(17) . ? 
Cu3 S6 2.2598(16) . ? 
Cu4 N9 2.015(5) . ? 
Cu4 S4 2.2261(17) . ? 
Cu4 S6 2.2701(17) . ? 
Cu4 Cu6 2.7832(11) . ? 
Cu5 N5 2.025(5) . ? 
Cu5 S4 2.2230(16) . ? 
Cu5 S2 2.2666(17) . ? 
Cu5 Cu6 2.7885(12) . ? 
Cu6 N7 2.023(5) . ? 
Cu6 S3 2.2443(16) . ? 
Cu6 S5 2.2566(17) . ? 
S1 C1 1.748(6) . ? 
S2 C11 1.767(6) . ? 
S3 C21 1.757(6) . ? 
S4 C31 1.762(7) . ? 
S5 C41 1.761(6) . ? 
S6 C51 1.769(6) . ? 
N1 C2 1.351(8) . ? 
N1 C1 1.369(7) . ? 
N2 C4 1.341(8) . ? 
N2 C1 1.353(7) . ? 
N3 C11 1.339(7) . ? 
N3 C12 1.366(8) . ? 
N4 C11 1.340(7) . ? 
N4 C14 1.346(7) . ? 
N5 C22 1.340(8) . ? 
N5 C21 1.344(8) . ? 
N6 C21 1.334(7) . ? 
N6 C24 1.350(7) . ? 
N7 C32 1.340(8) . ? 
N7 C31 1.346(7) . ? 
N8 C31 1.330(7) . ? 
N8 C34 1.347(7) . ? 
N9 C42 1.349(7) . ? 
N9 C41 1.355(7) . ? 
N10 C44 1.334(7) . ? 
N10 C41 1.338(7) . ? 
N11 C51 1.318(8) . ? 
N11 C52 1.376(8) . ? 
N12 C51 1.340(7) . ? 
N12 C54 1.377(7) . ? 
N13 C61 1.312(11) . ? 
N13 C63 1.430(12) . ? 
N13 C62 1.450(13) . ? 
N14 C64 1.316(12) . ? 
N14 C66 1.374(13) . ? 
N14 C65 1.495(15) . ? 
O1 C61 1.250(10) . ? 
O2 C64 1.279(12) . ? 
O3 C68 1.392(12) . ? 
O3 C69 1.436(10) . ? 
C2 C3 1.375(9) . ? 
C2 H2B 0.9500 . ? 
C3 C4 1.385(9) . ? 
C3 H3A 0.9500 . ? 
C4 C5 1.490(8) . ? 
C5 C10 1.379(10) . ? 
C5 C6 1.415(9) . ? 
C6 C7 1.393(10) . ? 
C6 H6B 0.9500 . ? 
C7 C8 1.379(12) . ? 
C7 H7A 0.9500 . ? 
C8 C9 1.389(12) . ? 
C8 H8B 0.9500 . ? 
C9 C10 1.412(10) . ? 
C9 H9A 0.9500 . ? 
C10 H10B 0.9500 . ? 
C12 C13 1.389(9) . ? 
C12 H12B 0.9500 . ? 
C13 C14 1.390(9) . ? 
C13 H13A 0.9500 . ? 
C14 C15 1.479(8) . ? 
C15 C16 1.377(10) . ? 
C15 C20 1.392(9) . ? 
C16 C17 1.382(10) . ? 
C16 H16A 0.9500 . ? 
C17 C18 1.425(12) . ? 
C17 H17A 0.9500 . ? 
C18 C19 1.340(12) . ? 
C18 H18A 0.9500 . ? 
C19 C20 1.402(10) . ? 
C19 H19A 0.9500 . ? 
C20 H20A 0.9500 . ? 
C22 C23 1.353(9) . ? 
C22 H22A 0.9500 . ? 
C23 C24 1.402(9) . ? 
C23 H23A 0.9500 . ? 
C24 C25 1.501(8) . ? 
C25 C30 1.404(10) . ? 
C25 C26 1.415(10) . ? 
C26 C27 1.353(12) . ? 
C26 H26A 0.9500 . ? 
C27 C28 1.352(14) . ? 
C27 H27A 0.9500 . ? 
C28 C29 1.390(13) . ? 
C28 H28A 0.9500 . ? 
C29 C30 1.377(10) . ? 
C29 H29A 0.9500 . ? 
C30 H30A 0.9500 . ? 
C32 C33 1.365(9) . ? 
C32 H32A 0.9500 . ? 
C33 C34 1.389(8) . ? 
C33 H33A 0.9500 . ? 
C34 C35 1.499(8) . ? 
C35 C36 1.386(9) . ? 
C35 C40 1.402(9) . ? 
C36 C37 1.361(9) . ? 
C36 H36A 0.9500 . ? 
C37 C38 1.341(10) . ? 
C37 H37A 0.9500 . ? 
C38 C39 1.391(9) . ? 
C38 H38A 0.9500 . ? 
C39 C40 1.392(9) . ? 
C39 H39A 0.9500 . ? 
C40 H40A 0.9500 . ? 
C42 C43 1.371(9) . ? 
C42 H42A 0.9500 . ? 
C43 C44 1.394(9) . ? 
C43 H43A 0.9500 . ? 
C44 C45 1.501(8) . ? 
C45 C46 1.371(9) . ? 
C45 C50 1.404(9) . ? 
C46 C47 1.386(10) . ? 
C46 H46A 0.9500 . ? 
C47 C48 1.381(11) . ? 
C47 H47A 0.9500 . ? 
C48 C49 1.365(11) . ? 
C48 H48A 0.9500 . ? 
C49 C50 1.389(9) . ? 
C49 H49A 0.9500 . ? 
C50 H50A 0.9500 . ? 
C52 C53 1.347(9) . ? 
C52 H52A 0.9500 . ? 
C53 C54 1.387(9) . ? 
C53 H53A 0.9500 . ? 
C54 C55 1.491(8) . ? 
C55 C56 1.379(10) . ? 
C55 C60 1.392(10) . ? 
C56 C57 1.397(10) . ? 
C56 H56A 0.9500 . ? 
C57 C58 1.363(13) . ? 
C57 H57A 0.9500 . ? 
C58 C59 1.397(14) . ? 
C58 H58A 0.9500 . ? 
C59 C60 1.387(11) . ? 
C59 H59A 0.9500 . ? 
C60 H60A 0.9500 . ? 
C61 H61A 0.9500 . ? 
C62 H62A 0.9800 . ? 
C62 H62B 0.9800 . ? 
C62 H62C 0.9800 . ? 
C63 H63A 0.9800 . ? 
C63 H63B 0.9800 . ? 
C63 H63C 0.9800 . ? 
C64 H64A 0.9500 . ? 
C65 H65A 0.9800 . ? 
C65 H65B 0.9800 . ? 
C65 H65C 0.9800 . ? 
C66 H66A 0.9800 . ? 
C66 H66B 0.9800 . ? 
C66 H66C 0.9800 . ? 
C67 C68 1.41(2) . ? 
C67 H67A 0.9800 . ? 
C67 H67B 0.9800 . ? 
C67 H67C 0.9800 . ? 
C68 H68A 0.9900 . ? 
C68 H68B 0.9900 . ? 
C69 C70 1.518(13) . ? 
C69 H69A 0.9900 . ? 
C69 H69B 0.9900 . ? 
C70 H70A 0.9800 . ? 
C70 H70B 0.9800 . ? 
C70 H70C 0.9800 . ? 
 
loop_ 
 _geom_angle_atom_site_label_1 
 _geom_angle_atom_site_label_2 
 _geom_angle_atom_site_label_3 
 _geom_angle 
 _geom_angle_site_symmetry_1 
 _geom_angle_site_symmetry_3 
 _geom_angle_publ_flag 
N3 Cu1 S1 120.37(15) . . ? 
N3 Cu1 S3 112.77(15) . . ? 
S1 Cu1 S3 118.85(6) . . ? 
N3 Cu1 Cu3 90.00(14) . . ? 
S1 Cu1 Cu3 77.74(5) . . ? 
S3 Cu1 Cu3 131.35(5) . . ? 
N3 Cu1 Cu2 146.84(14) . . ? 
S1 Cu1 Cu2 49.34(5) . . ? 
S3 Cu1 Cu2 96.59(5) . . ? 
Cu3 Cu1 Cu2 58.06(3) . . ? 
N3 Cu1 Cu5 83.93(14) . . ? 
S1 Cu1 Cu5 140.31(5) . . ? 
S3 Cu1 Cu5 69.67(4) . . ? 
Cu3 Cu1 Cu5 70.94(3) . . ? 
Cu2 Cu1 Cu5 92.63(4) . . ? 
N11 Cu2 S1 122.32(16) . . ? 
N11 Cu2 S5 106.53(16) . . ? 
S1 Cu2 S5 122.22(6) . . ? 
N11 Cu2 Cu3 89.58(16) . . ? 
S1 Cu2 Cu3 78.04(5) . . ? 
S5 Cu2 Cu3 134.41(5) . . ? 
N11 Cu2 Cu1 147.24(16) . . ? 
S1 Cu2 Cu1 49.51(4) . . ? 
S5 Cu2 Cu1 101.61(5) . . ? 
Cu3 Cu2 Cu1 58.39(3) . . ? 
N11 Cu2 Cu4 81.34(15) . . ? 
S1 Cu2 Cu4 137.53(5) . . ? 
S5 Cu2 Cu4 74.01(4) . . ? 
Cu3 Cu2 Cu4 66.55(3) . . ? 
Cu1 Cu2 Cu4 90.75(4) . . ? 
N1 Cu3 S2 121.27(15) . . ? 
N1 Cu3 S6 117.59(15) . . ? 
S2 Cu3 S6 113.41(6) . . ? 
N1 Cu3 Cu2 88.74(15) . . ? 
S2 Cu3 Cu2 128.69(5) . . ? 
S6 Cu3 Cu2 78.89(5) . . ? 
N1 Cu3 Cu1 89.20(14) . . ? 
S2 Cu3 Cu1 75.40(4) . . ? 
S6 Cu3 Cu1 133.52(5) . . ? 
Cu2 Cu3 Cu1 63.55(3) . . ? 
N9 Cu4 S4 122.81(15) . . ? 
N9 Cu4 S6 109.64(15) . . ? 
S4 Cu4 S6 120.12(6) . . ? 
N9 Cu4 Cu6 86.98(15) . . ? 
S4 Cu4 Cu6 75.66(5) . . ? 
S6 Cu4 Cu6 137.07(5) . . ? 
N9 Cu4 Cu2 83.90(14) . . ? 
S4 Cu4 Cu2 133.66(5) . . ? 
S6 Cu4 Cu2 74.39(4) . . ? 
Cu6 Cu4 Cu2 68.25(3) . . ? 
N5 Cu5 S4 127.42(15) . . ? 
N5 Cu5 S2 114.27(15) . . ? 
S4 Cu5 S2 111.94(6) . . ? 
N5 Cu5 Cu6 92.00(14) . . ? 
S4 Cu5 Cu6 75.59(5) . . ? 
S2 Cu5 Cu6 130.87(5) . . ? 
N5 Cu5 Cu1 86.20(14) . . ? 
S4 Cu5 Cu1 132.50(5) . . ? 
S2 Cu5 Cu1 71.08(4) . . ? 
Cu6 Cu5 Cu1 70.16(3) . . ? 
N7 Cu6 S3 125.04(14) . . ? 
N7 Cu6 S5 120.67(14) . . ? 
S3 Cu6 S5 107.63(6) . . ? 
N7 Cu6 Cu4 88.28(14) . . ? 
S3 Cu6 Cu4 128.11(5) . . ? 
S5 Cu6 Cu4 78.09(5) . . ? 
N7 Cu6 Cu5 89.48(14) . . ? 
S3 Cu6 Cu5 73.74(5) . . ? 
S5 Cu6 Cu5 133.46(6) . . ? 
Cu4 Cu6 Cu5 67.53(3) . . ? 
C1 S1 Cu2 106.07(19) . . ? 
C1 S1 Cu1 107.30(19) . . ? 
Cu2 S1 Cu1 81.14(6) . . ? 
C11 S2 Cu3 110.18(19) . . ? 
C11 S2 Cu5 100.6(2) . . ? 
Cu3 S2 Cu5 95.30(6) . . ? 
C21 S3 Cu6 111.06(19) . . ? 
C21 S3 Cu1 103.5(2) . . ? 
Cu6 S3 Cu1 94.36(6) . . ? 
C31 S4 Cu5 105.66(19) . . ? 
C31 S4 Cu4 106.56(18) . . ? 
Cu5 S4 Cu4 88.22(6) . . ? 
C41 S5 Cu6 106.65(19) . . ? 
C41 S5 Cu2 102.5(2) . . ? 
Cu6 S5 Cu2 91.03(6) . . ? 
C51 S6 Cu3 109.2(2) . . ? 
C51 S6 Cu4 100.2(2) . . ? 
Cu3 S6 Cu4 88.06(6) . . ? 
C2 N1 C1 115.6(5) . . ? 
C2 N1 Cu3 125.4(4) . . ? 
C1 N1 Cu3 118.9(4) . . ? 
C4 N2 C1 118.1(5) . . ? 
C11 N3 C12 116.4(5) . . ? 
C11 N3 Cu1 117.5(4) . . ? 
C12 N3 Cu1 125.4(4) . . ? 
C11 N4 C14 117.7(5) . . ? 
C22 N5 C21 115.9(5) . . ? 
C22 N5 Cu5 128.6(4) . . ? 
C21 N5 Cu5 115.2(4) . . ? 
C21 N6 C24 117.1(5) . . ? 
C32 N7 C31 116.4(5) . . ? 
C32 N7 Cu6 127.2(4) . . ? 
C31 N7 Cu6 116.4(4) . . ? 
C31 N8 C34 118.5(5) . . ? 
C42 N9 C41 115.6(5) . . ? 
C42 N9 Cu4 122.9(4) . . ? 
C41 N9 Cu4 121.0(4) . . ? 
C44 N10 C41 117.5(5) . . ? 
C51 N11 C52 117.6(5) . . ? 
C51 N11 Cu2 121.4(4) . . ? 
C52 N11 Cu2 120.5(4) . . ? 
C51 N12 C54 116.6(5) . . ? 
C61 N13 C63 122.3(8) . . ? 
C61 N13 C62 119.9(8) . . ? 
C63 N13 C62 117.7(9) . . ? 
C64 N14 C66 123.4(10) . . ? 
C64 N14 C65 118.3(10) . . ? 
C66 N14 C65 118.1(10) . . ? 
C68 O3 C69 114.1(8) . . ? 
N2 C1 N1 124.3(5) . . ? 
N2 C1 S1 117.4(4) . . ? 
N1 C1 S1 118.2(4) . . ? 
N1 C2 C3 123.2(6) . . ? 
N1 C2 H2B 118.4 . . ? 
C3 C2 H2B 118.4 . . ? 
C2 C3 C4 117.6(6) . . ? 
C2 C3 H3A 121.2 . . ? 
C4 C3 H3A 121.2 . . ? 
N2 C4 C3 121.2(6) . . ? 
N2 C4 C5 115.4(5) . . ? 
C3 C4 C5 123.3(6) . . ? 
C10 C5 C6 118.8(6) . . ? 
C10 C5 C4 120.7(6) . . ? 
C6 C5 C4 120.6(6) . . ? 
C7 C6 C5 119.9(7) . . ? 
C7 C6 H6B 120.0 . . ? 
C5 C6 H6B 120.0 . . ? 
C8 C7 C6 120.3(7) . . ? 
C8 C7 H7A 119.8 . . ? 
C6 C7 H7A 119.8 . . ? 
C7 C8 C9 120.9(7) . . ? 
C7 C8 H8B 119.5 . . ? 
C9 C8 H8B 119.5 . . ? 
C8 C9 C10 118.5(7) . . ? 
C8 C9 H9A 120.7 . . ? 
C10 C9 H9A 120.7 . . ? 
C5 C10 C9 121.5(7) . . ? 
C5 C10 H10B 119.2 . . ? 
C9 C10 H10B 119.2 . . ? 
N3 C11 N4 126.1(5) . . ? 
N3 C11 S2 117.0(4) . . ? 
N4 C11 S2 116.9(4) . . ? 
N3 C12 C13 120.6(6) . . ? 
N3 C12 H12B 119.7 . . ? 
C13 C12 H12B 119.7 . . ? 
C12 C13 C14 118.9(6) . . ? 
C12 C13 H13A 120.5 . . ? 
C14 C13 H13A 120.5 . . ? 
N4 C14 C13 120.2(5) . . ? 
N4 C14 C15 116.8(5) . . ? 
C13 C14 C15 122.9(6) . . ? 
C16 C15 C20 118.2(6) . . ? 
C16 C15 C14 119.8(6) . . ? 
C20 C15 C14 122.1(6) . . ? 
C15 C16 C17 122.2(7) . . ? 
C15 C16 H16A 118.9 . . ? 
C17 C16 H16A 118.9 . . ? 
C16 C17 C18 118.4(8) . . ? 
C16 C17 H17A 120.8 . . ? 
C18 C17 H17A 120.8 . . ? 
C19 C18 C17 119.9(7) . . ? 
C19 C18 H18A 120.1 . . ? 
C17 C18 H18A 120.1 . . ? 
C18 C19 C20 121.0(7) . . ? 
C18 C19 H19A 119.5 . . ? 
C20 C19 H19A 119.5 . . ? 
C15 C20 C19 120.3(7) . . ? 
C15 C20 H20A 119.9 . . ? 
C19 C20 H20A 119.9 . . ? 
N6 C21 N5 125.4(5) . . ? 
N6 C21 S3 116.5(4) . . ? 
N5 C21 S3 118.2(4) . . ? 
N5 C22 C23 124.0(6) . . ? 
N5 C22 H22A 118.0 . . ? 
C23 C22 H22A 118.0 . . ? 
C22 C23 C24 116.4(6) . . ? 
C22 C23 H23A 121.8 . . ? 
C24 C23 H23A 121.8 . . ? 
N6 C24 C23 121.2(6) . . ? 
N6 C24 C25 115.7(5) . . ? 
C23 C24 C25 123.0(6) . . ? 
C30 C25 C26 119.0(7) . . ? 
C30 C25 C24 120.0(6) . . ? 
C26 C25 C24 121.0(7) . . ? 
C27 C26 C25 119.5(9) . . ? 
C27 C26 H26A 120.2 . . ? 
C25 C26 H26A 120.2 . . ? 
C28 C27 C26 122.4(9) . . ? 
C28 C27 H27A 118.8 . . ? 
C26 C27 H27A 118.8 . . ? 
C27 C28 C29 118.9(8) . . ? 
C27 C28 H28A 120.5 . . ? 
C29 C28 H28A 120.5 . . ? 
C30 C29 C28 121.4(9) . . ? 
C30 C29 H29A 119.3 . . ? 
C28 C29 H29A 119.3 . . ? 
C29 C30 C25 118.7(7) . . ? 
C29 C30 H30A 120.7 . . ? 
C25 C30 H30A 120.7 . . ? 
N8 C31 N7 124.7(6) . . ? 
N8 C31 S4 116.6(4) . . ? 
N7 C31 S4 118.6(4) . . ? 
N7 C32 C33 122.4(6) . . ? 
N7 C32 H32A 118.8 . . ? 
C33 C32 H32A 118.8 . . ? 
C32 C33 C34 118.2(6) . . ? 
C32 C33 H33A 120.9 . . ? 
C34 C33 H33A 120.9 . . ? 
N8 C34 C33 119.7(5) . . ? 
N8 C34 C35 116.3(5) . . ? 
C33 C34 C35 124.0(5) . . ? 
C36 C35 C40 118.4(6) . . ? 
C36 C35 C34 123.3(5) . . ? 
C40 C35 C34 118.3(5) . . ? 
C37 C36 C35 120.4(6) . . ? 
C37 C36 H36A 119.8 . . ? 
C35 C36 H36A 119.8 . . ? 
C38 C37 C36 122.0(6) . . ? 
C38 C37 H37A 119.0 . . ? 
C36 C37 H37A 119.0 . . ? 
C37 C38 C39 119.9(6) . . ? 
C37 C38 H38A 120.1 . . ? 
C39 C38 H38A 120.1 . . ? 
C38 C39 C40 119.4(6) . . ? 
C38 C39 H39A 120.3 . . ? 
C40 C39 H39A 120.3 . . ? 
C39 C40 C35 119.9(6) . . ? 
C39 C40 H40A 120.0 . . ? 
C35 C40 H40A 120.0 . . ? 
N10 C41 N9 125.2(5) . . ? 
N10 C41 S5 117.8(4) . . ? 
N9 C41 S5 117.0(4) . . ? 
N9 C42 C43 123.3(6) . . ? 
N9 C42 H42A 118.4 . . ? 
C43 C42 H42A 118.4 . . ? 
C42 C43 C44 116.5(6) . . ? 
C42 C43 H43A 121.7 . . ? 
C44 C43 H43A 121.7 . . ? 
N10 C44 C43 121.9(5) . . ? 
N10 C44 C45 115.6(5) . . ? 
C43 C44 C45 122.5(5) . . ? 
C46 C45 C50 119.4(6) . . ? 
C46 C45 C44 120.0(5) . . ? 
C50 C45 C44 120.5(6) . . ? 
C45 C46 C47 120.9(6) . . ? 
C45 C46 H46A 119.5 . . ? 
C47 C46 H46A 119.5 . . ? 
C48 C47 C46 119.6(7) . . ? 
C48 C47 H47A 120.2 . . ? 
C46 C47 H47A 120.2 . . ? 
C49 C48 C47 119.9(7) . . ? 
C49 C48 H48A 120.1 . . ? 
C47 C48 H48A 120.1 . . ? 
C48 C49 C50 121.2(7) . . ? 
C48 C49 H49A 119.4 . . ? 
C50 C49 H49A 119.4 . . ? 
C49 C50 C45 118.8(7) . . ? 
C49 C50 H50A 120.6 . . ? 
C45 C50 H50A 120.6 . . ? 
N11 C51 N12 125.4(5) . . ? 
N11 C51 S6 117.9(4) . . ? 
N12 C51 S6 116.6(4) . . ? 
C53 C52 N11 121.0(6) . . ? 
C53 C52 H52A 119.5 . . ? 
N11 C52 H52A 119.5 . . ? 
C52 C53 C54 118.8(6) . . ? 
C52 C53 H53A 120.6 . . ? 
C54 C53 H53A 120.6 . . ? 
N12 C54 C53 120.5(5) . . ? 
N12 C54 C55 115.5(6) . . ? 
C53 C54 C55 124.0(6) . . ? 
C56 C55 C60 119.3(7) . . ? 
C56 C55 C54 120.7(6) . . ? 
C60 C55 C54 120.0(7) . . ? 
C55 C56 C57 121.7(7) . . ? 
C55 C56 H56A 119.1 . . ? 
C57 C56 H56A 119.1 . . ? 
C58 C57 C56 118.4(8) . . ? 
C58 C57 H57A 120.8 . . ? 
C56 C57 H57A 120.8 . . ? 
C57 C58 C59 121.0(7) . . ? 
C57 C58 H58A 119.5 . . ? 
C59 C58 H58A 119.5 . . ? 
C60 C59 C58 120.1(8) . . ? 
C60 C59 H59A 120.0 . . ? 
C58 C59 H59A 120.0 . . ? 
C59 C60 C55 119.4(8) . . ? 
C59 C60 H60A 120.3 . . ? 
C55 C60 H60A 120.3 . . ? 
O1 C61 N13 124.2(9) . . ? 
O1 C61 H61A 117.9 . . ? 
N13 C61 H61A 117.9 . . ? 
N13 C62 H62A 109.5 . . ? 
N13 C62 H62B 109.5 . . ? 
H62A C62 H62B 109.5 . . ? 
N13 C62 H62C 109.5 . . ? 
H62A C62 H62C 109.5 . . ? 
H62B C62 H62C 109.5 . . ? 
N13 C63 H63A 109.5 . . ? 
N13 C63 H63B 109.5 . . ? 
H63A C63 H63B 109.5 . . ? 
N13 C63 H63C 109.5 . . ? 
H63A C63 H63C 109.5 . . ? 
H63B C63 H63C 109.5 . . ? 
O2 C64 N14 119.9(11) . . ? 
O2 C64 H64A 120.1 . . ? 
N14 C64 H64A 120.1 . . ? 
N14 C65 H65A 109.5 . . ? 
N14 C65 H65B 109.5 . . ? 
H65A C65 H65B 109.5 . . ? 
N14 C65 H65C 109.5 . . ? 
H65A C65 H65C 109.5 . . ? 
H65B C65 H65C 109.5 . . ? 
N14 C66 H66A 109.5 . . ? 
N14 C66 H66B 109.5 . . ? 
H66A C66 H66B 109.5 . . ? 
N14 C66 H66C 109.5 . . ? 
H66A C66 H66C 109.5 . . ? 
H66B C66 H66C 109.5 . . ? 
C68 C67 H67A 109.5 . . ? 
C68 C67 H67B 109.5 . . ? 
H67A C67 H67B 109.5 . . ? 
C68 C67 H67C 109.5 . . ? 
H67A C67 H67C 109.5 . . ? 
H67B C67 H67C 109.5 . . ? 
O3 C68 C67 106.1(12) . . ? 
O3 C68 H68A 110.5 . . ? 
C67 C68 H68A 110.5 . . ? 
O3 C68 H68B 110.5 . . ? 
C67 C68 H68B 110.5 . . ? 
H68A C68 H68B 108.7 . . ? 
O3 C69 C70 109.4(8) . . ? 
O3 C69 H69A 109.8 . . ? 
C70 C69 H69A 109.8 . . ? 
O3 C69 H69B 109.8 . . ? 
C70 C69 H69B 109.8 . . ? 
H69A C69 H69B 108.2 . . ? 
C69 C70 H70A 109.5 . . ? 
C69 C70 H70B 109.5 . . ? 
H70A C70 H70B 109.5 . . ? 
C69 C70 H70C 109.5 . . ? 
H70A C70 H70C 109.5 . . ? 
H70B C70 H70C 109.5 . . ? 
 
_diffrn_measured_fraction_theta_max    0.976 
_diffrn_reflns_theta_full              27.47 
_diffrn_measured_fraction_theta_full   0.976 
_refine_diff_density_max    0.873 
_refine_diff_density_min   -0.487 
_refine_diff_density_rms    0.093 


#===END

 
 
data_1h 
 
_audit_creation_method            SHELXL-97 
_chemical_name_systematic 
; 
 ? 
; 
_chemical_name_common             ? 
_chemical_melting_point           ? 
_chemical_formula_moiety         
 'C100 H70 Cl12 Cu6 N12 S6' 
_chemical_formula_sum 
 'C100 H70 Cl12 Cu6 N12 S6' 
_chemical_formula_weight          2438.68 
 
loop_ 
 _atom_type_symbol 
 _atom_type_description 
 _atom_type_scat_dispersion_real 
 _atom_type_scat_dispersion_imag 
 _atom_type_scat_source 
 'C'  'C'   0.0033   0.0016 
 'International Tables Vol C Tables 4.2.6.8 and 6.1.1.4' 
 'H'  'H'   0.0000   0.0000 
 'International Tables Vol C Tables 4.2.6.8 and 6.1.1.4' 
 'Cu'  'Cu'   0.3201   1.2651 
 'International Tables Vol C Tables 4.2.6.8 and 6.1.1.4' 
 'N'  'N'   0.0061   0.0033 
 'International Tables Vol C Tables 4.2.6.8 and 6.1.1.4' 
 'S'  'S'   0.1246   0.1234 
 'International Tables Vol C Tables 4.2.6.8 and 6.1.1.4' 
 'Cl'  'Cl'   0.1484   0.1585 
 'International Tables Vol C Tables 4.2.6.8 and 6.1.1.4' 
 
_symmetry_cell_setting            triclinic 
_symmetry_space_group_name_H-M    'P -1' 
_symmetry_space_group_name_Hall    '-P 1' 
 
loop_ 
 _symmetry_equiv_pos_as_xyz 
 'x, y, z' 
 '-x, -y, -z' 
 
_cell_length_a                    12.8655(12) 
_cell_length_b                    14.1590(13) 
_cell_length_c                    16.1031(15) 
_cell_angle_alpha                 115.333(2) 
_cell_angle_beta                  104.641(2) 
_cell_angle_gamma                 96.319(2) 
_cell_volume                      2484.1(4) 
_cell_formula_units_Z             1 
_cell_measurement_temperature     173(2) 
_cell_measurement_reflns_used     9936 
_cell_measurement_theta_min       2.27 
_cell_measurement_theta_max       28.33 
 
_exptl_crystal_description        'block' 
_exptl_crystal_colour             'yellow'
_exptl_crystal_size_max           0.20 
_exptl_crystal_size_mid           0.10 
_exptl_crystal_size_min           0.10 
_exptl_crystal_density_meas       ? 
_exptl_crystal_density_diffrn     1.630 
_exptl_crystal_density_method     'not measured' 
_exptl_crystal_F_000              1228 
_exptl_absorpt_coefficient_mu     1.765 
_exptl_absorpt_correction_type     multi-scan 
_exptl_absorpt_correction_T_min   0.7192 
_exptl_absorpt_correction_T_max   0.8433 
_exptl_absorpt_process_details    
'Jacobson, R. (1998) Private communication' 
 
_exptl_special_details 
; 
 ? 
; 
 
_diffrn_ambient_temperature       173(2) 
_diffrn_radiation_wavelength      0.71073 
_diffrn_radiation_type            MoK\a 
_diffrn_radiation_source          'fine-focus sealed tube' 
_diffrn_radiation_monochromator   graphite 
_diffrn_measurement_device_type   'Bruker APEX-II CCD' 
_diffrn_measurement_method        '\f and \w scans' 
_diffrn_detector_area_resol_mean  ? 
_diffrn_standards_number          0 
_diffrn_standards_interval_count  0 
_diffrn_standards_interval_time   0 
_diffrn_standards_decay_%         0 
_diffrn_reflns_number             81964 
_diffrn_reflns_av_R_equivalents   0.0569 
_diffrn_reflns_av_sigmaI/netI     0.0516 
_diffrn_reflns_limit_h_min        -17 
_diffrn_reflns_limit_h_max        17 
_diffrn_reflns_limit_k_min        -18 
_diffrn_reflns_limit_k_max        18 
_diffrn_reflns_limit_l_min        -21 
_diffrn_reflns_limit_l_max        21 
_diffrn_reflns_theta_min          2.27 
_diffrn_reflns_theta_max          28.36 
_reflns_number_total              12291 
_reflns_number_gt                 9276 
_reflns_threshold_expression      >2sigma(I) 
 
_computing_data_collection        'Bruker APEX2'
_computing_cell_refinement       'Bruker SAINT'
_computing_data_reduction        'Bruker SAINT' 
_computing_structure_solution     'SHELXS-97 (Sheldrick, 1990)' 
_computing_structure_refinement   'SHELXL-97 (Sheldrick, 1997)' 
_computing_molecular_graphics     'Bruker SHELXTL'
_computing_publication_material  'Bruker SHELXTL'   
 
_refine_special_details 
; 
 Refinement of F^2^ against ALL reflections.  The weighted R-factor wR and 
 goodness of fit S are based on F^2^, conventional R-factors R are based 
 on F, with F set to zero for negative F^2^. The threshold expression of 
 F^2^ > 2sigma(F^2^) is used only for calculating R-factors(gt) etc. and is 
 not relevant to the choice of reflections for refinement.  R-factors based 
 on F^2^ are statistically about twice as large as those based on F, and R- 
 factors based on ALL data will be even larger. 
; 
 
_refine_ls_structure_factor_coef  Fsqd  
_refine_ls_matrix_type            full 
_refine_ls_weighting_scheme       calc  
_refine_ls_weighting_details 
 'calc w=1/[\s^2^(Fo^2^)+(0.0000P)^2^+14.8191P] where P=(Fo^2^+2Fc^2^)/3' 
_atom_sites_solution_primary      direct 
_atom_sites_solution_secondary    difmap 
_atom_sites_solution_hydrogens    geom 
_refine_ls_hydrogen_treatment     constr 
_refine_ls_extinction_method      none 
_refine_ls_extinction_coef        ? 
_refine_ls_number_reflns          12291 
_refine_ls_number_parameters      619 
_refine_ls_number_restraints      0 
_refine_ls_R_factor_all           0.0829 
_refine_ls_R_factor_gt            0.0580 
_refine_ls_wR_factor_ref          0.1258 
_refine_ls_wR_factor_gt           0.1170 
_refine_ls_goodness_of_fit_ref    1.100 
_refine_ls_restrained_S_all       1.100 
_refine_ls_shift/su_max           0.001 
_refine_ls_shift/su_mean          0.000 
 
loop_ 
 _atom_site_label 
 _atom_site_type_symbol 
 _atom_site_fract_x 
 _atom_site_fract_y 
 _atom_site_fract_z 
 _atom_site_U_iso_or_equiv 
 _atom_site_adp_type 
 _atom_site_occupancy 
 _atom_site_symmetry_multiplicity 
 _atom_site_calc_flag 
 _atom_site_refinement_flags 
 _atom_site_disorder_assembly 
 _atom_site_disorder_group 
Cu1 Cu -0.00938(4) 0.33839(4) 0.94245(4) 0.01757(12) Uani 1 1 d . . . 
Cu2 Cu 0.05800(4) 0.49495(4) 0.88333(4) 0.01660(11) Uani 1 1 d . . . 
Cu3 Cu 0.15203(4) 0.52790(4) 1.10761(4) 0.01580(11) Uani 1 1 d . . . 
S1 S 0.21367(8) 0.48776(8) 0.97910(7) 0.01416(19) Uani 1 1 d . . . 
S2 S -0.04283(8) 0.33584(8) 1.07183(7) 0.01471(19) Uani 1 1 d . . . 
S3 S -0.14773(8) 0.29977(8) 0.80960(7) 0.01406(19) Uani 1 1 d . . . 
N1 N 0.1289(3) 0.2855(3) 0.9334(3) 0.0165(7) Uani 1 1 d . . . 
N2 N 0.3052(3) 0.3215(3) 0.9181(2) 0.0157(7) Uani 1 1 d . . . 
N3 N 0.1747(3) 0.4249(3) 1.1635(2) 0.0161(7) Uani 1 1 d . . . 
N4 N 0.1016(3) 0.2610(3) 1.1601(3) 0.0173(7) Uani 1 1 d . . . 
N5 N -0.0105(3) 0.3814(3) 0.7433(2) 0.0168(7) Uani 1 1 d . . . 
N6 N -0.1193(3) 0.2022(3) 0.6382(2) 0.0168(7) Uani 1 1 d . . . 
C1 C 0.2163(3) 0.3516(3) 0.9384(3) 0.0130(7) Uani 1 1 d . . . 
C2 C 0.1446(3) 0.1914(3) 0.9282(3) 0.0170(8) Uani 1 1 d . . . 
H2 H 0.0870 0.1454 0.9304 0.020 Uiso 1 1 calc R . . 
C3 C 0.2396(3) 0.1576(3) 0.9196(3) 0.0143(8) Uani 1 1 d . . . 
C4 C 0.3154(3) 0.2219(3) 0.9037(3) 0.0152(8) Uani 1 1 d . . . 
C5 C 0.2550(3) 0.0618(3) 0.9327(3) 0.0182(8) Uani 1 1 d . . . 
C6 C 0.1663(4) -0.0283(4) 0.8907(3) 0.0245(9) Uani 1 1 d . . . 
H6 H 0.0984 -0.0321 0.8474 0.029 Uiso 1 1 calc R . . 
C7 C 0.1771(5) -0.1127(4) 0.9121(4) 0.0307(11) Uani 1 1 d . . . 
H7 H 0.1159 -0.1733 0.8845 0.037 Uiso 1 1 calc R . . 
C8 C 0.2756(5) -0.1091(4) 0.9726(4) 0.0337(12) Uani 1 1 d . . . 
H8 H 0.2825 -0.1671 0.9869 0.040 Uiso 1 1 calc R . . 
C9 C 0.3646(4) -0.0211(4) 1.0130(4) 0.0331(11) Uani 1 1 d . . . 
H9 H 0.4329 -0.0192 1.0546 0.040 Uiso 1 1 calc R . . 
C10 C 0.3555(4) 0.0648(4) 0.9934(3) 0.0245(9) Uani 1 1 d . . . 
H10 H 0.4172 0.1249 1.0211 0.029 Uiso 1 1 calc R . . 
C11 C 0.4084(3) 0.1883(3) 0.8696(3) 0.0176(8) Uani 1 1 d . . . 
C12 C 0.3973(4) 0.0803(4) 0.8062(3) 0.0244(9) Uani 1 1 d . . . 
H12 H 0.3317 0.0274 0.7873 0.029 Uiso 1 1 calc R . . 
C13 C 0.4831(4) 0.0505(4) 0.7708(4) 0.0326(11) Uani 1 1 d . . . 
H13 H 0.4754 -0.0228 0.7268 0.039 Uiso 1 1 calc R . . 
C14 C 0.5789(4) 0.1266(5) 0.7993(4) 0.0370(12) Uani 1 1 d . . . 
H14 H 0.6378 0.1055 0.7759 0.044 Uiso 1 1 calc R . . 
C15 C 0.5898(4) 0.2329(4) 0.8613(4) 0.0357(12) Uani 1 1 d . . . 
H15 H 0.6560 0.2853 0.8806 0.043 Uiso 1 1 calc R . . 
C16 C 0.5045(4) 0.2641(4) 0.8959(3) 0.0249(10) Uani 1 1 d . . . 
H16 H 0.5119 0.3380 0.9380 0.030 Uiso 1 1 calc R . . 
C17 C 0.0905(3) 0.3411(3) 1.1382(3) 0.0155(8) Uani 1 1 d . . . 
C18 C 0.2754(4) 0.4256(3) 1.2140(3) 0.0186(8) Uani 1 1 d . . . 
H18 H 0.3361 0.4835 1.2327 0.022 Uiso 1 1 calc R . . 
C19 C 0.2958(3) 0.3460(4) 1.2406(3) 0.0191(8) Uani 1 1 d . . . 
C20 C 0.2025(4) 0.2641(3) 1.2120(3) 0.0187(8) Uani 1 1 d . . . 
C21 C 0.4126(4) 0.3526(4) 1.2914(3) 0.0218(9) Uani 1 1 d . . . 
C22 C 0.4576(4) 0.2643(4) 1.2587(4) 0.0288(10) Uani 1 1 d . . . 
H22 H 0.4117 0.1964 1.2075 0.035 Uiso 1 1 calc R . . 
C23 C 0.5695(4) 0.2749(5) 1.3007(4) 0.0351(12) Uani 1 1 d . . . 
H23 H 0.6001 0.2144 1.2776 0.042 Uiso 1 1 calc R . . 
C24 C 0.6366(4) 0.3729(5) 1.3759(4) 0.0375(13) Uani 1 1 d . . . 
H24 H 0.7132 0.3799 1.4043 0.045 Uiso 1 1 calc R . . 
C25 C 0.5923(4) 0.4599(5) 1.4094(4) 0.0352(12) Uani 1 1 d . . . 
H25 H 0.6383 0.5272 1.4615 0.042 Uiso 1 1 calc R . . 
C26 C 0.4808(4) 0.4506(4) 1.3678(4) 0.0281(10) Uani 1 1 d . . . 
H26 H 0.4507 0.5114 1.3915 0.034 Uiso 1 1 calc R . . 
C27 C 0.2057(4) 0.1751(4) 1.2383(3) 0.0215(9) Uani 1 1 d . . . 
C28 C 0.1588(4) 0.0687(4) 1.1670(4) 0.0270(10) Uani 1 1 d . . . 
H28 H 0.1265 0.0521 1.1008 0.032 Uiso 1 1 calc R . . 
C29 C 0.1592(4) -0.0136(4) 1.1923(4) 0.0355(12) Uani 1 1 d . . . 
H29 H 0.1292 -0.0866 1.1432 0.043 Uiso 1 1 calc R . . 
C30 C 0.2032(4) 0.0103(4) 1.2886(4) 0.0353(13) Uani 1 1 d . . . 
H30 H 0.2018 -0.0460 1.3059 0.042 Uiso 1 1 calc R . . 
C31 C 0.2489(5) 0.1160(5) 1.3596(4) 0.0406(13) Uani 1 1 d . . . 
H31 H 0.2786 0.1326 1.4260 0.049 Uiso 1 1 calc R . . 
C32 C 0.2520(4) 0.1985(4) 1.3345(4) 0.0314(11) Uani 1 1 d . . . 
H32 H 0.2858 0.2711 1.3835 0.038 Uiso 1 1 calc R . . 
C33 C -0.0863(3) 0.2935(3) 0.7222(3) 0.0148(8) Uani 1 1 d . . . 
C34 C 0.0133(4) 0.3827(3) 0.6673(3) 0.0195(9) Uani 1 1 d . . . 
H34 H 0.0616 0.4458 0.6784 0.023 Uiso 1 1 calc R . . 
C35 C -0.0285(3) 0.2973(3) 0.5739(3) 0.0177(8) Uani 1 1 d . . . 
C36 C -0.0859(3) 0.2008(3) 0.5645(3) 0.0173(8) Uani 1 1 d . . . 
C37 C -0.0175(4) 0.3144(4) 0.4914(3) 0.0214(9) Uani 1 1 d . . . 
C38 C 0.0783(4) 0.3770(4) 0.4987(4) 0.0307(11) Uani 1 1 d . . . 
H38 H 0.1415 0.4055 0.5559 0.037 Uiso 1 1 calc R . . 
C39 C 0.0826(5) 0.3987(5) 0.4225(4) 0.0383(13) Uani 1 1 d . . . 
H39 H 0.1490 0.4406 0.4274 0.046 Uiso 1 1 calc R . . 
C40 C -0.0100(5) 0.3590(5) 0.3399(4) 0.0395(14) Uani 1 1 d . . . 
H40 H -0.0077 0.3745 0.2884 0.047 Uiso 1 1 calc R . . 
C41 C -0.1057(5) 0.2969(4) 0.3325(3) 0.0341(12) Uani 1 1 d . . . 
H41 H -0.1692 0.2696 0.2758 0.041 Uiso 1 1 calc R . . 
C42 C -0.1097(4) 0.2742(4) 0.4078(3) 0.0262(10) Uani 1 1 d . . . 
H42 H -0.1758 0.2310 0.4020 0.031 Uiso 1 1 calc R . . 
C43 C -0.1110(4) 0.0930(3) 0.4803(3) 0.0184(8) Uani 1 1 d . . . 
C44 C -0.0399(4) 0.0670(4) 0.4253(3) 0.0231(9) Uani 1 1 d . . . 
H44 H 0.0214 0.1212 0.4382 0.028 Uiso 1 1 calc R . . 
C45 C -0.0584(4) -0.0378(4) 0.3521(3) 0.0273(10) Uani 1 1 d . . . 
H45 H -0.0095 -0.0552 0.3155 0.033 Uiso 1 1 calc R . . 
C46 C -0.1477(4) -0.1166(4) 0.3326(3) 0.0308(11) Uani 1 1 d . . . 
H46 H -0.1599 -0.1883 0.2829 0.037 Uiso 1 1 calc R . . 
C47 C -0.2196(4) -0.0917(4) 0.3853(3) 0.0311(11) Uani 1 1 d . . . 
H47 H -0.2818 -0.1460 0.3708 0.037 Uiso 1 1 calc R . . 
C48 C -0.2014(4) 0.0120(4) 0.4588(3) 0.0243(9) Uani 1 1 d . . . 
H48 H -0.2507 0.0283 0.4952 0.029 Uiso 1 1 calc R . . 
C49 C 0.6395(4) 0.5044(5) 0.1717(4) 0.0348(12) Uani 1 1 d . . . 
H49 H 0.6607 0.5230 0.1240 0.042 Uiso 1 1 calc R . . 
C50 C 0.6134(7) 0.2298(7) 0.5930(5) 0.084(3) Uani 1 1 d . . . 
H50 H 0.6578 0.1946 0.6264 0.100 Uiso 1 1 calc R A 1 
Cl1 Cl 0.52265(19) 0.28531(16) 0.65052(16) 0.0744(6) Uani 1 1 d . B . 
Cl2 Cl 0.7141(2) 0.3552(2) 0.5945(2) 0.0364(6) Uiso 0.50 1 d P B 1 
Cl3 Cl 0.5627(4) 0.1489(4) 0.4684(4) 0.0925(14) Uiso 0.50 1 d P B 1 
Cl2A Cl 0.6255(5) 0.2545(5) 0.5149(5) 0.0436(13) Uiso 0.25 1 d P B 2 
Cl3A Cl 0.5330(5) 0.0712(5) 0.5318(5) 0.0477(14) Uiso 0.25 1 d P . 2 
Cl2B Cl 0.6682(6) 0.3005(6) 0.5571(5) 0.0472(14) Uiso 0.25 1 d P B 3 
Cl3B Cl 0.5340(8) 0.0903(8) 0.4990(7) 0.076(2) Uiso 0.25 1 d P B 3 
Cl4 Cl 0.69420(19) 0.39628(14) 0.17045(14) 0.0665(5) Uani 1 1 d . . . 
Cl5 Cl 0.49575(13) 0.47324(18) 0.13718(13) 0.0756(7) Uani 1 1 d . . . 
Cl6 Cl 0.69829(13) 0.61737(13) 0.28712(12) 0.0517(4) Uani 1 1 d . . . 
 
loop_ 
 _atom_site_aniso_label 
 _atom_site_aniso_U_11 
 _atom_site_aniso_U_22 
 _atom_site_aniso_U_33 
 _atom_site_aniso_U_23 
 _atom_site_aniso_U_13 
 _atom_site_aniso_U_12 
Cu1 0.0144(2) 0.0264(3) 0.0181(3) 0.0142(2) 0.0074(2) 0.0082(2) 
Cu2 0.0170(3) 0.0144(2) 0.0171(2) 0.0069(2) 0.0045(2) 0.0043(2) 
Cu3 0.0205(3) 0.0138(2) 0.0183(2) 0.0093(2) 0.0107(2) 0.0062(2) 
S1 0.0168(5) 0.0129(4) 0.0160(5) 0.0079(4) 0.0079(4) 0.0053(4) 
S2 0.0149(5) 0.0153(5) 0.0180(5) 0.0108(4) 0.0065(4) 0.0040(4) 
S3 0.0162(5) 0.0140(4) 0.0137(4) 0.0071(4) 0.0067(4) 0.0038(4) 
N1 0.0157(17) 0.0171(17) 0.0201(18) 0.0091(15) 0.0091(14) 0.0075(14) 
N2 0.0155(17) 0.0155(17) 0.0192(17) 0.0094(14) 0.0084(14) 0.0047(13) 
N3 0.0185(17) 0.0171(17) 0.0181(17) 0.0113(15) 0.0084(14) 0.0072(14) 
N4 0.0210(18) 0.0191(17) 0.0194(17) 0.0141(15) 0.0088(15) 0.0066(14) 
N5 0.0179(17) 0.0182(17) 0.0160(17) 0.0083(14) 0.0072(14) 0.0061(14) 
N6 0.0201(18) 0.0171(17) 0.0146(17) 0.0072(14) 0.0074(14) 0.0071(14) 
C1 0.0172(19) 0.0124(18) 0.0108(18) 0.0065(15) 0.0050(15) 0.0036(15) 
C2 0.015(2) 0.0156(19) 0.021(2) 0.0088(17) 0.0069(16) 0.0017(16) 
C3 0.0162(19) 0.0131(18) 0.0126(18) 0.0048(15) 0.0048(15) 0.0056(15) 
C4 0.016(2) 0.0137(19) 0.0149(19) 0.0055(16) 0.0052(16) 0.0064(15) 
C5 0.020(2) 0.018(2) 0.022(2) 0.0115(18) 0.0113(17) 0.0077(17) 
C6 0.027(2) 0.018(2) 0.029(2) 0.0121(19) 0.010(2) 0.0038(18) 
C7 0.045(3) 0.016(2) 0.032(3) 0.012(2) 0.017(2) 0.004(2) 
C8 0.049(3) 0.026(3) 0.044(3) 0.025(2) 0.023(3) 0.017(2) 
C9 0.033(3) 0.042(3) 0.041(3) 0.029(3) 0.017(2) 0.022(2) 
C10 0.019(2) 0.027(2) 0.031(2) 0.016(2) 0.0088(19) 0.0067(18) 
C11 0.017(2) 0.021(2) 0.020(2) 0.0106(17) 0.0091(17) 0.0090(17) 
C12 0.029(2) 0.020(2) 0.026(2) 0.0095(19) 0.013(2) 0.0087(19) 
C13 0.044(3) 0.027(3) 0.038(3) 0.016(2) 0.025(2) 0.023(2) 
C14 0.033(3) 0.047(3) 0.048(3) 0.026(3) 0.029(3) 0.022(3) 
C15 0.022(2) 0.038(3) 0.047(3) 0.016(3) 0.019(2) 0.006(2) 
C16 0.019(2) 0.024(2) 0.031(3) 0.010(2) 0.0129(19) 0.0075(18) 
C17 0.019(2) 0.0155(19) 0.0163(19) 0.0094(16) 0.0084(16) 0.0054(16) 
C18 0.021(2) 0.019(2) 0.019(2) 0.0117(18) 0.0073(17) 0.0058(17) 
C19 0.018(2) 0.024(2) 0.022(2) 0.0164(19) 0.0071(17) 0.0090(17) 
C20 0.020(2) 0.021(2) 0.020(2) 0.0124(18) 0.0080(17) 0.0091(17) 
C21 0.022(2) 0.031(2) 0.023(2) 0.020(2) 0.0096(18) 0.0103(19) 
C22 0.027(2) 0.030(3) 0.035(3) 0.018(2) 0.013(2) 0.010(2) 
C23 0.030(3) 0.041(3) 0.048(3) 0.029(3) 0.018(2) 0.018(2) 
C24 0.021(2) 0.057(4) 0.048(3) 0.035(3) 0.011(2) 0.014(2) 
C25 0.025(3) 0.043(3) 0.035(3) 0.020(3) 0.004(2) 0.005(2) 
C26 0.027(2) 0.030(3) 0.029(3) 0.017(2) 0.007(2) 0.008(2) 
C27 0.023(2) 0.024(2) 0.026(2) 0.0164(19) 0.0110(19) 0.0116(18) 
C28 0.021(2) 0.024(2) 0.037(3) 0.017(2) 0.005(2) 0.0072(19) 
C29 0.027(3) 0.023(2) 0.061(4) 0.026(3) 0.011(3) 0.007(2) 
C30 0.037(3) 0.037(3) 0.064(4) 0.043(3) 0.027(3) 0.021(2) 
C31 0.054(4) 0.049(3) 0.045(3) 0.037(3) 0.025(3) 0.025(3) 
C32 0.042(3) 0.029(3) 0.034(3) 0.021(2) 0.015(2) 0.013(2) 
C33 0.016(2) 0.0165(19) 0.0141(19) 0.0085(16) 0.0054(16) 0.0055(16) 
C34 0.024(2) 0.020(2) 0.020(2) 0.0107(18) 0.0107(18) 0.0059(17) 
C35 0.019(2) 0.021(2) 0.016(2) 0.0089(17) 0.0096(17) 0.0067(17) 
C36 0.019(2) 0.020(2) 0.0116(18) 0.0056(16) 0.0050(16) 0.0080(17) 
C37 0.031(2) 0.023(2) 0.018(2) 0.0113(18) 0.0135(19) 0.0150(19) 
C38 0.039(3) 0.036(3) 0.024(2) 0.018(2) 0.017(2) 0.010(2) 
C39 0.050(3) 0.047(3) 0.039(3) 0.029(3) 0.030(3) 0.018(3) 
C40 0.073(4) 0.048(3) 0.030(3) 0.031(3) 0.037(3) 0.038(3) 
C41 0.051(3) 0.046(3) 0.017(2) 0.019(2) 0.017(2) 0.027(3) 
C42 0.037(3) 0.031(2) 0.018(2) 0.014(2) 0.014(2) 0.016(2) 
C43 0.022(2) 0.021(2) 0.0112(18) 0.0065(17) 0.0043(16) 0.0081(17) 
C44 0.025(2) 0.026(2) 0.021(2) 0.0113(19) 0.0089(18) 0.0094(19) 
C45 0.036(3) 0.030(3) 0.016(2) 0.0073(19) 0.012(2) 0.017(2) 
C46 0.042(3) 0.021(2) 0.018(2) 0.0031(19) 0.003(2) 0.010(2) 
C47 0.031(3) 0.025(2) 0.021(2) 0.002(2) 0.001(2) 0.002(2) 
C48 0.023(2) 0.024(2) 0.022(2) 0.0073(19) 0.0074(18) 0.0056(19) 
C49 0.032(3) 0.047(3) 0.036(3) 0.024(3) 0.021(2) 0.010(2) 
C50 0.077(6) 0.099(6) 0.039(4) 0.004(4) -0.001(4) 0.059(5) 
Cl1 0.0867(15) 0.0567(11) 0.0783(13) 0.0208(10) 0.0444(12) 0.0196(10) 
Cl4 0.1078(16) 0.0501(10) 0.0659(11) 0.0387(9) 0.0408(11) 0.0340(10) 
Cl5 0.0295(8) 0.1042(15) 0.0456(9) -0.0024(10) 0.0161(7) -0.0072(9) 
Cl6 0.0416(8) 0.0421(8) 0.0534(9) 0.0154(7) 0.0037(7) 0.0033(7) 
 
_geom_special_details 
; 
 All esds (except the esd in the dihedral angle between two l.s. planes) 
 are estimated using the full covariance matrix.  The cell esds are taken 
 into account individually in the estimation of esds in distances, angles 
 and torsion angles; correlations between esds in cell parameters are only 
 used when they are defined by crystal symmetry.  An approximate (isotropic) 
 treatment of cell esds is used for estimating esds involving l.s. planes. 
; 
 
loop_ 
 _geom_bond_atom_site_label_1 
 _geom_bond_atom_site_label_2 
 _geom_bond_distance 
 _geom_bond_site_symmetry_2 
 _geom_bond_publ_flag 
Cu1 N1 2.019(3) . ? 
Cu1 S3 2.2144(11) . ? 
Cu1 S2 2.2454(11) . ? 
Cu1 Cu2 2.8934(7) . ? 
Cu1 Cu3 2.9087(8) . ? 
Cu1 Cu3 2.9875(7) 2_567 ? 
Cu2 N5 2.006(3) . ? 
Cu2 S2 2.2346(11) 2_567 ? 
Cu2 S1 2.2400(11) . ? 
Cu2 Cu3 2.7340(8) 2_567 ? 
Cu3 N3 2.027(3) . ? 
Cu3 S3 2.2399(11) 2_567 ? 
Cu3 S1 2.2708(11) . ? 
Cu3 Cu2 2.7340(8) 2_567 ? 
Cu3 Cu1 2.9875(7) 2_567 ? 
S1 C1 1.758(4) . ? 
S2 C17 1.752(4) . ? 
S2 Cu2 2.2346(11) 2_567 ? 
S3 C33 1.757(4) . ? 
S3 Cu3 2.2399(11) 2_567 ? 
N1 C2 1.340(5) . ? 
N1 C1 1.344(5) . ? 
N2 C1 1.332(5) . ? 
N2 C4 1.355(5) . ? 
N3 C18 1.339(5) . ? 
N3 C17 1.352(5) . ? 
N4 C17 1.335(5) . ? 
N4 C20 1.340(5) . ? 
N5 C34 1.342(5) . ? 
N5 C33 1.348(5) . ? 
N6 C33 1.331(5) . ? 
N6 C36 1.353(5) . ? 
C2 C3 1.378(6) . ? 
C2 H2 0.9500 . ? 
C3 C4 1.406(6) . ? 
C3 C5 1.485(5) . ? 
C4 C11 1.482(5) . ? 
C5 C6 1.392(6) . ? 
C5 C10 1.394(6) . ? 
C6 C7 1.388(6) . ? 
C6 H6 0.9500 . ? 
C7 C8 1.370(7) . ? 
C7 H7 0.9500 . ? 
C8 C9 1.379(7) . ? 
C8 H8 0.9500 . ? 
C9 C10 1.391(6) . ? 
C9 H9 0.9500 . ? 
C10 H10 0.9500 . ? 
C11 C16 1.382(6) . ? 
C11 C12 1.394(6) . ? 
C12 C13 1.390(6) . ? 
C12 H12 0.9500 . ? 
C13 C14 1.375(8) . ? 
C13 H13 0.9500 . ? 
C14 C15 1.371(8) . ? 
C14 H14 0.9500 . ? 
C15 C16 1.383(6) . ? 
C15 H15 0.9500 . ? 
C16 H16 0.9500 . ? 
C18 C19 1.395(5) . ? 
C18 H18 0.9500 . ? 
C19 C20 1.398(6) . ? 
C19 C21 1.491(6) . ? 
C20 C27 1.492(6) . ? 
C21 C22 1.387(6) . ? 
C21 C26 1.390(7) . ? 
C22 C23 1.387(7) . ? 
C22 H22 0.9500 . ? 
C23 C24 1.380(8) . ? 
C23 H23 0.9500 . ? 
C24 C25 1.370(8) . ? 
C24 H24 0.9500 . ? 
C25 C26 1.386(7) . ? 
C25 H25 0.9500 . ? 
C26 H26 0.9500 . ? 
C27 C32 1.384(6) . ? 
C27 C28 1.386(7) . ? 
C28 C29 1.391(6) . ? 
C28 H28 0.9500 . ? 
C29 C30 1.380(8) . ? 
C29 H29 0.9500 . ? 
C30 C31 1.376(8) . ? 
C30 H30 0.9500 . ? 
C31 C32 1.390(7) . ? 
C31 H31 0.9500 . ? 
C32 H32 0.9500 . ? 
C34 C35 1.380(6) . ? 
C34 H34 0.9500 . ? 
C35 C36 1.406(6) . ? 
C35 C37 1.486(6) . ? 
C36 C43 1.474(6) . ? 
C37 C38 1.385(7) . ? 
C37 C42 1.390(6) . ? 
C38 C39 1.399(6) . ? 
C38 H38 0.9500 . ? 
C39 C40 1.385(8) . ? 
C39 H39 0.9500 . ? 
C40 C41 1.378(8) . ? 
C40 H40 0.9500 . ? 
C41 C42 1.392(6) . ? 
C41 H41 0.9500 . ? 
C42 H42 0.9500 . ? 
C43 C48 1.398(6) . ? 
C43 C44 1.400(6) . ? 
C44 C45 1.390(6) . ? 
C44 H44 0.9500 . ? 
C45 C46 1.379(7) . ? 
C45 H45 0.9500 . ? 
C46 C47 1.382(7) . ? 
C46 H46 0.9500 . ? 
C47 C48 1.382(6) . ? 
C47 H47 0.9500 . ? 
C48 H48 0.9500 . ? 
C49 Cl5 1.736(5) . ? 
C49 Cl4 1.748(6) . ? 
C49 Cl6 1.750(6) . ? 
C49 H49 1.0000 . ? 
C50 Cl2A 1.479(11) . ? 
C50 Cl2B 1.543(12) . ? 
C50 Cl3 1.723(9) . ? 
C50 Cl1 1.723(8) . ? 
C50 Cl3B 1.858(13) . ? 
C50 Cl3A 2.041(12) . ? 
C50 Cl2 2.067(11) . ? 
C50 H50 1.0000 . ? 
Cl3A Cl3A 1.803(13) 2_656 ? 
 
loop_ 
 _geom_angle_atom_site_label_1 
 _geom_angle_atom_site_label_2 
 _geom_angle_atom_site_label_3 
 _geom_angle 
 _geom_angle_site_symmetry_1 
 _geom_angle_site_symmetry_3 
 _geom_angle_publ_flag 
N1 Cu1 S3 121.08(10) . . ? 
N1 Cu1 S2 107.43(10) . . ? 
S3 Cu1 S2 120.79(4) . . ? 
N1 Cu1 Cu2 90.47(10) . . ? 
S3 Cu1 Cu2 75.40(3) . . ? 
S2 Cu1 Cu2 138.68(4) . . ? 
N1 Cu1 Cu3 81.75(10) . . ? 
S3 Cu1 Cu3 138.24(3) . . ? 
S2 Cu1 Cu3 76.45(3) . . ? 
Cu2 Cu1 Cu3 69.54(2) . . ? 
N1 Cu1 Cu3 144.85(10) . 2_567 ? 
S3 Cu1 Cu3 48.24(3) . 2_567 ? 
S2 Cu1 Cu3 104.65(3) . 2_567 ? 
Cu2 Cu1 Cu3 55.380(17) . 2_567 ? 
Cu3 Cu1 Cu3 92.23(2) . 2_567 ? 
N5 Cu2 S2 120.16(10) . 2_567 ? 
N5 Cu2 S1 120.58(10) . . ? 
S2 Cu2 S1 112.19(4) 2_567 . ? 
N5 Cu2 Cu3 86.39(10) . 2_567 ? 
S2 Cu2 Cu3 80.45(3) 2_567 2_567 ? 
S1 Cu2 Cu3 129.72(3) . 2_567 ? 
N5 Cu2 Cu1 89.51(10) . . ? 
S2 Cu2 Cu1 132.40(3) 2_567 . ? 
S1 Cu2 Cu1 73.90(3) . . ? 
Cu3 Cu2 Cu1 64.056(18) 2_567 . ? 
N3 Cu3 S3 125.80(10) . 2_567 ? 
N3 Cu3 S1 112.45(10) . . ? 
S3 Cu3 S1 115.85(4) 2_567 . ? 
N3 Cu3 Cu2 87.82(10) . 2_567 ? 
S3 Cu3 Cu2 78.48(3) 2_567 2_567 ? 
S1 Cu3 Cu2 131.27(4) . 2_567 ? 
N3 Cu3 Cu1 83.10(10) . . ? 
S3 Cu3 Cu1 133.28(3) 2_567 . ? 
S1 Cu3 Cu1 73.18(3) . . ? 
Cu2 Cu3 Cu1 65.649(19) 2_567 . ? 
N3 Cu3 Cu1 147.97(10) . 2_567 ? 
S3 Cu3 Cu1 47.52(3) 2_567 2_567 ? 
S1 Cu3 Cu1 93.90(3) . 2_567 ? 
Cu2 Cu3 Cu1 60.564(18) 2_567 2_567 ? 
Cu1 Cu3 Cu1 87.77(2) . 2_567 ? 
C1 S1 Cu2 108.35(14) . . ? 
C1 S1 Cu3 103.51(13) . . ? 
Cu2 S1 Cu3 94.37(4) . . ? 
C17 S2 Cu2 108.08(14) . 2_567 ? 
C17 S2 Cu1 99.63(13) . . ? 
Cu2 S2 Cu1 86.24(4) 2_567 . ? 
C33 S3 Cu1 105.92(14) . . ? 
C33 S3 Cu3 106.47(14) . 2_567 ? 
Cu1 S3 Cu3 84.24(4) . 2_567 ? 
C2 N1 C1 115.8(3) . . ? 
C2 N1 Cu1 125.8(3) . . ? 
C1 N1 Cu1 118.3(3) . . ? 
C1 N2 C4 118.0(3) . . ? 
C18 N3 C17 116.4(3) . . ? 
C18 N3 Cu3 122.3(3) . . ? 
C17 N3 Cu3 120.5(3) . . ? 
C17 N4 C20 118.2(4) . . ? 
C34 N5 C33 115.7(4) . . ? 
C34 N5 Cu2 126.3(3) . . ? 
C33 N5 Cu2 118.0(3) . . ? 
C33 N6 C36 118.5(4) . . ? 
N2 C1 N1 124.4(4) . . ? 
N2 C1 S1 118.6(3) . . ? 
N1 C1 S1 116.9(3) . . ? 
N1 C2 C3 123.7(4) . . ? 
N1 C2 H2 118.2 . . ? 
C3 C2 H2 118.2 . . ? 
C2 C3 C4 115.5(4) . . ? 
C2 C3 C5 118.0(4) . . ? 
C4 C3 C5 126.4(4) . . ? 
N2 C4 C3 120.2(4) . . ? 
N2 C4 C11 115.2(3) . . ? 
C3 C4 C11 124.5(4) . . ? 
C6 C5 C10 119.4(4) . . ? 
C6 C5 C3 120.1(4) . . ? 
C10 C5 C3 120.2(4) . . ? 
C7 C6 C5 120.1(4) . . ? 
C7 C6 H6 120.0 . . ? 
C5 C6 H6 120.0 . . ? 
C8 C7 C6 120.4(5) . . ? 
C8 C7 H7 119.8 . . ? 
C6 C7 H7 119.8 . . ? 
C7 C8 C9 120.0(4) . . ? 
C7 C8 H8 120.0 . . ? 
C9 C8 H8 120.0 . . ? 
C8 C9 C10 120.7(5) . . ? 
C8 C9 H9 119.7 . . ? 
C10 C9 H9 119.7 . . ? 
C9 C10 C5 119.4(4) . . ? 
C9 C10 H10 120.3 . . ? 
C5 C10 H10 120.3 . . ? 
C16 C11 C12 119.4(4) . . ? 
C16 C11 C4 120.5(4) . . ? 
C12 C11 C4 120.0(4) . . ? 
C13 C12 C11 119.5(4) . . ? 
C13 C12 H12 120.2 . . ? 
C11 C12 H12 120.2 . . ? 
C14 C13 C12 120.3(5) . . ? 
C14 C13 H13 119.8 . . ? 
C12 C13 H13 119.8 . . ? 
C15 C14 C13 120.2(5) . . ? 
C15 C14 H14 119.9 . . ? 
C13 C14 H14 119.9 . . ? 
C14 C15 C16 120.1(5) . . ? 
C14 C15 H15 119.9 . . ? 
C16 C15 H15 119.9 . . ? 
C11 C16 C15 120.4(4) . . ? 
C11 C16 H16 119.8 . . ? 
C15 C16 H16 119.8 . . ? 
N4 C17 N3 124.5(4) . . ? 
N4 C17 S2 117.1(3) . . ? 
N3 C17 S2 118.4(3) . . ? 
N3 C18 C19 123.5(4) . . ? 
N3 C18 H18 118.2 . . ? 
C19 C18 H18 118.2 . . ? 
C18 C19 C20 115.3(4) . . ? 
C18 C19 C21 118.3(4) . . ? 
C20 C19 C21 126.4(4) . . ? 
N4 C20 C19 122.0(4) . . ? 
N4 C20 C27 114.5(4) . . ? 
C19 C20 C27 123.5(4) . . ? 
C22 C21 C26 119.0(4) . . ? 
C22 C21 C19 120.9(4) . . ? 
C26 C21 C19 119.8(4) . . ? 
C23 C22 C21 120.1(5) . . ? 
C23 C22 H22 120.0 . . ? 
C21 C22 H22 120.0 . . ? 
C24 C23 C22 120.4(5) . . ? 
C24 C23 H23 119.8 . . ? 
C22 C23 H23 119.8 . . ? 
C25 C24 C23 119.8(5) . . ? 
C25 C24 H24 120.1 . . ? 
C23 C24 H24 120.1 . . ? 
C24 C25 C26 120.4(5) . . ? 
C24 C25 H25 119.8 . . ? 
C26 C25 H25 119.8 . . ? 
C25 C26 C21 120.3(5) . . ? 
C25 C26 H26 119.9 . . ? 
C21 C26 H26 119.9 . . ? 
C32 C27 C28 119.6(4) . . ? 
C32 C27 C20 120.2(4) . . ? 
C28 C27 C20 120.1(4) . . ? 
C27 C28 C29 119.9(5) . . ? 
C27 C28 H28 120.1 . . ? 
C29 C28 H28 120.1 . . ? 
C30 C29 C28 120.3(5) . . ? 
C30 C29 H29 119.9 . . ? 
C28 C29 H29 119.9 . . ? 
C31 C30 C29 119.9(4) . . ? 
C31 C30 H30 120.1 . . ? 
C29 C30 H30 120.1 . . ? 
C30 C31 C32 120.2(5) . . ? 
C30 C31 H31 119.9 . . ? 
C32 C31 H31 119.9 . . ? 
C27 C32 C31 120.1(5) . . ? 
C27 C32 H32 119.9 . . ? 
C31 C32 H32 119.9 . . ? 
N6 C33 N5 124.2(4) . . ? 
N6 C33 S3 117.5(3) . . ? 
N5 C33 S3 118.3(3) . . ? 
N5 C34 C35 123.6(4) . . ? 
N5 C34 H34 118.2 . . ? 
C35 C34 H34 118.2 . . ? 
C34 C35 C36 115.6(4) . . ? 
C34 C35 C37 119.3(4) . . ? 
C36 C35 C37 124.9(4) . . ? 
N6 C36 C35 119.8(4) . . ? 
N6 C36 C43 114.8(4) . . ? 
C35 C36 C43 125.3(4) . . ? 
C38 C37 C42 119.2(4) . . ? 
C38 C37 C35 121.9(4) . . ? 
C42 C37 C35 118.7(4) . . ? 
C37 C38 C39 120.4(5) . . ? 
C37 C38 H38 119.8 . . ? 
C39 C38 H38 119.8 . . ? 
C40 C39 C38 120.0(5) . . ? 
C40 C39 H39 120.0 . . ? 
C38 C39 H39 120.0 . . ? 
C41 C40 C39 119.8(4) . . ? 
C41 C40 H40 120.1 . . ? 
C39 C40 H40 120.1 . . ? 
C40 C41 C42 120.3(5) . . ? 
C40 C41 H41 119.8 . . ? 
C42 C41 H41 119.8 . . ? 
C37 C42 C41 120.4(5) . . ? 
C37 C42 H42 119.8 . . ? 
C41 C42 H42 119.8 . . ? 
C48 C43 C44 118.6(4) . . ? 
C48 C43 C36 120.3(4) . . ? 
C44 C43 C36 120.9(4) . . ? 
C45 C44 C43 120.4(4) . . ? 
C45 C44 H44 119.8 . . ? 
C43 C44 H44 119.8 . . ? 
C46 C45 C44 120.0(4) . . ? 
C46 C45 H45 120.0 . . ? 
C44 C45 H45 120.0 . . ? 
C45 C46 C47 120.2(4) . . ? 
C45 C46 H46 119.9 . . ? 
C47 C46 H46 119.9 . . ? 
C48 C47 C46 120.2(5) . . ? 
C48 C47 H47 119.9 . . ? 
C46 C47 H47 119.9 . . ? 
C47 C48 C43 120.5(4) . . ? 
C47 C48 H48 119.7 . . ? 
C43 C48 H48 119.7 . . ? 
Cl5 C49 Cl4 112.7(3) . . ? 
Cl5 C49 Cl6 110.6(3) . . ? 
Cl4 C49 Cl6 110.0(3) . . ? 
Cl5 C49 H49 107.8 . . ? 
Cl4 C49 H49 107.8 . . ? 
Cl6 C49 H49 107.8 . . ? 
Cl2A C50 Cl2B 28.1(3) . . ? 
Cl2A C50 Cl3 50.6(4) . . ? 
Cl2B C50 Cl3 78.0(5) . . ? 
Cl2A C50 Cl1 117.2(5) . . ? 
Cl2B C50 Cl1 113.1(6) . . ? 
Cl3 C50 Cl1 118.1(5) . . ? 
Cl2A C50 Cl3B 89.5(5) . . ? 
Cl2B C50 Cl3B 116.5(6) . . ? 
Cl3 C50 Cl3B 39.0(4) . . ? 
Cl1 C50 Cl3B 105.2(6) . . ? 
Cl2A C50 Cl3A 109.0(5) . . ? 
Cl2B C50 Cl3A 135.1(6) . . ? 
Cl3 C50 Cl3A 58.6(4) . . ? 
Cl1 C50 Cl3A 98.1(5) . . ? 
Cl3B C50 Cl3A 19.7(3) . . ? 
Cl2A C50 Cl2 47.3(4) . . ? 
Cl2B C50 Cl2 19.3(3) . . ? 
Cl3 C50 Cl2 97.1(5) . . ? 
Cl1 C50 Cl2 106.1(4) . . ? 
Cl3B C50 Cl2 135.0(6) . . ? 
Cl3A C50 Cl2 152.1(5) . . ? 
Cl2A C50 H50 130.7 . . ? 
Cl2B C50 H50 121.2 . . ? 
Cl3 C50 H50 111.5 . . ? 
Cl1 C50 H50 111.5 . . ? 
Cl3B C50 H50 85.5 . . ? 
Cl3A C50 H50 70.7 . . ? 
Cl2 C50 H50 111.5 . . ? 
Cl3A Cl3A C50 174.5(7) 2_656 . ? 
 
loop_ 
 _geom_torsion_atom_site_label_1 
 _geom_torsion_atom_site_label_2 
 _geom_torsion_atom_site_label_3 
 _geom_torsion_atom_site_label_4 
 _geom_torsion 
 _geom_torsion_site_symmetry_1 
 _geom_torsion_site_symmetry_2 
 _geom_torsion_site_symmetry_3 
 _geom_torsion_site_symmetry_4 
 _geom_torsion_publ_flag 
N1 Cu1 Cu2 N5 84.84(14) . . . . ? 
S3 Cu1 Cu2 N5 -37.25(10) . . . . ? 
S2 Cu1 Cu2 N5 -157.58(11) . . . . ? 
Cu3 Cu1 Cu2 N5 165.85(10) . . . . ? 
Cu3 Cu1 Cu2 N5 -86.22(10) 2_567 . . . ? 
N1 Cu1 Cu2 S2 -142.89(11) . . . 2_567 ? 
S3 Cu1 Cu2 S2 95.01(5) . . . 2_567 ? 
S2 Cu1 Cu2 S2 -25.31(9) . . . 2_567 ? 
Cu3 Cu1 Cu2 S2 -61.89(5) . . . 2_567 ? 
Cu3 Cu1 Cu2 S2 46.05(5) 2_567 . . 2_567 ? 
N1 Cu1 Cu2 S1 -37.30(10) . . . . ? 
S3 Cu1 Cu2 S1 -159.39(4) . . . . ? 
S2 Cu1 Cu2 S1 80.29(6) . . . . ? 
Cu3 Cu1 Cu2 S1 43.71(3) . . . . ? 
Cu3 Cu1 Cu2 S1 151.64(3) 2_567 . . . ? 
N1 Cu1 Cu2 Cu3 171.06(10) . . . 2_567 ? 
S3 Cu1 Cu2 Cu3 48.97(3) . . . 2_567 ? 
S2 Cu1 Cu2 Cu3 -71.36(5) . . . 2_567 ? 
Cu3 Cu1 Cu2 Cu3 -107.93(2) . . . 2_567 ? 
N1 Cu1 Cu3 N3 -65.56(14) . . . . ? 
S3 Cu1 Cu3 N3 166.07(11) . . . . ? 
S2 Cu1 Cu3 N3 44.70(10) . . . . ? 
Cu2 Cu1 Cu3 N3 -159.17(10) . . . . ? 
Cu3 Cu1 Cu3 N3 149.24(10) 2_567 . . . ? 
N1 Cu1 Cu3 S3 160.38(11) . . . 2_567 ? 
S3 Cu1 Cu3 S3 32.01(8) . . . 2_567 ? 
S2 Cu1 Cu3 S3 -89.36(5) . . . 2_567 ? 
Cu2 Cu1 Cu3 S3 66.77(4) . . . 2_567 ? 
Cu3 Cu1 Cu3 S3 15.18(4) 2_567 . . 2_567 ? 
N1 Cu1 Cu3 S1 50.45(10) . . . . ? 
S3 Cu1 Cu3 S1 -77.92(6) . . . . ? 
S2 Cu1 Cu3 S1 160.71(4) . . . . ? 
Cu2 Cu1 Cu3 S1 -43.17(3) . . . . ? 
Cu3 Cu1 Cu3 S1 -94.75(3) 2_567 . . . ? 
N1 Cu1 Cu3 Cu2 -156.28(10) . . . 2_567 ? 
S3 Cu1 Cu3 Cu2 75.35(5) . . . 2_567 ? 
S2 Cu1 Cu3 Cu2 -46.02(3) . . . 2_567 ? 
Cu2 Cu1 Cu3 Cu2 110.103(19) . . . 2_567 ? 
Cu3 Cu1 Cu3 Cu2 58.517(17) 2_567 . . 2_567 ? 
N1 Cu1 Cu3 Cu1 145.20(10) . . . 2_567 ? 
S3 Cu1 Cu3 Cu1 16.83(5) . . . 2_567 ? 
S2 Cu1 Cu3 Cu1 -104.54(3) . . . 2_567 ? 
Cu2 Cu1 Cu3 Cu1 51.586(15) . . . 2_567 ? 
Cu3 Cu1 Cu3 Cu1 0.0 2_567 . . 2_567 ? 
N5 Cu2 S1 C1 -30.06(18) . . . . ? 
S2 Cu2 S1 C1 179.33(14) 2_567 . . . ? 
Cu3 Cu2 S1 C1 83.25(14) 2_567 . . . ? 
Cu1 Cu2 S1 C1 49.52(13) . . . . ? 
N5 Cu2 S1 Cu3 -135.86(12) . . . . ? 
S2 Cu2 S1 Cu3 73.53(5) 2_567 . . . ? 
Cu3 Cu2 S1 Cu3 -22.55(6) 2_567 . . . ? 
Cu1 Cu2 S1 Cu3 -56.27(3) . . . . ? 
N3 Cu3 S1 C1 20.97(18) . . . . ? 
S3 Cu3 S1 C1 175.58(14) 2_567 . . . ? 
Cu2 Cu3 S1 C1 -86.96(14) 2_567 . . . ? 
Cu1 Cu3 S1 C1 -53.92(14) . . . . ? 
Cu1 Cu3 S1 C1 -140.41(14) 2_567 . . . ? 
N3 Cu3 S1 Cu2 131.04(11) . . . . ? 
S3 Cu3 S1 Cu2 -74.36(5) 2_567 . . . ? 
Cu2 Cu3 S1 Cu2 23.10(6) 2_567 . . . ? 
Cu1 Cu3 S1 Cu2 56.14(3) . . . . ? 
Cu1 Cu3 S1 Cu2 -30.34(3) 2_567 . . . ? 
N1 Cu1 S2 C17 22.45(18) . . . . ? 
S3 Cu1 S2 C17 167.22(14) . . . . ? 
Cu2 Cu1 S2 C17 -89.28(14) . . . . ? 
Cu3 Cu1 S2 C17 -54.22(14) . . . . ? 
Cu3 Cu1 S2 C17 -142.98(14) 2_567 . . . ? 
N1 Cu1 S2 Cu2 130.17(11) . . . 2_567 ? 
S3 Cu1 S2 Cu2 -85.05(5) . . . 2_567 ? 
Cu2 Cu1 S2 Cu2 18.44(7) . . . 2_567 ? 
Cu3 Cu1 S2 Cu2 53.50(3) . . . 2_567 ? 
Cu3 Cu1 S2 Cu2 -35.26(4) 2_567 . . 2_567 ? 
N1 Cu1 S3 C33 -32.36(18) . . . . ? 
S2 Cu1 S3 C33 -172.37(14) . . . . ? 
Cu2 Cu1 S3 C33 49.19(14) . . . . ? 
Cu3 Cu1 S3 C33 82.69(15) . . . . ? 
Cu3 Cu1 S3 C33 105.52(14) 2_567 . . . ? 
N1 Cu1 S3 Cu3 -137.87(12) . . . 2_567 ? 
S2 Cu1 S3 Cu3 82.11(5) . . . 2_567 ? 
Cu2 Cu1 S3 Cu3 -56.32(3) . . . 2_567 ? 
Cu3 Cu1 S3 Cu3 -22.82(6) . . . 2_567 ? 
S3 Cu1 N1 C2 -89.2(3) . . . . ? 
S2 Cu1 N1 C2 55.4(4) . . . . ? 
Cu2 Cu1 N1 C2 -162.4(3) . . . . ? 
Cu3 Cu1 N1 C2 128.3(3) . . . . ? 
Cu3 Cu1 N1 C2 -149.6(3) 2_567 . . . ? 
S3 Cu1 N1 C1 94.7(3) . . . . ? 
S2 Cu1 N1 C1 -120.6(3) . . . . ? 
Cu2 Cu1 N1 C1 21.6(3) . . . . ? 
Cu3 Cu1 N1 C1 -47.7(3) . . . . ? 
Cu3 Cu1 N1 C1 34.4(4) 2_567 . . . ? 
S3 Cu3 N3 C18 -80.3(3) 2_567 . . . ? 
S1 Cu3 N3 C18 71.3(3) . . . . ? 
Cu2 Cu3 N3 C18 -154.4(3) 2_567 . . . ? 
Cu1 Cu3 N3 C18 139.9(3) . . . . ? 
Cu1 Cu3 N3 C18 -145.6(3) 2_567 . . . ? 
S3 Cu3 N3 C17 110.3(3) 2_567 . . . ? 
S1 Cu3 N3 C17 -98.1(3) . . . . ? 
Cu2 Cu3 N3 C17 36.2(3) 2_567 . . . ? 
Cu1 Cu3 N3 C17 -29.5(3) . . . . ? 
Cu1 Cu3 N3 C17 45.0(4) 2_567 . . . ? 
S2 Cu2 N5 C34 60.0(4) 2_567 . . . ? 
S1 Cu2 N5 C34 -88.3(3) . . . . ? 
Cu3 Cu2 N5 C34 136.8(3) 2_567 . . . ? 
Cu1 Cu2 N5 C34 -159.2(3) . . . . ? 
S2 Cu2 N5 C33 -121.5(3) 2_567 . . . ? 
S1 Cu2 N5 C33 90.2(3) . . . . ? 
Cu3 Cu2 N5 C33 -44.7(3) 2_567 . . . ? 
Cu1 Cu2 N5 C33 19.3(3) . . . . ? 
C4 N2 C1 N1 -8.9(6) . . . . ? 
C4 N2 C1 S1 168.4(3) . . . . ? 
C2 N1 C1 N2 14.7(6) . . . . ? 
Cu1 N1 C1 N2 -168.9(3) . . . . ? 
C2 N1 C1 S1 -162.7(3) . . . . ? 
Cu1 N1 C1 S1 13.8(4) . . . . ? 
Cu2 S1 C1 N2 126.4(3) . . . . ? 
Cu3 S1 C1 N2 -134.3(3) . . . . ? 
Cu2 S1 C1 N1 -56.1(3) . . . . ? 
Cu3 S1 C1 N1 43.3(3) . . . . ? 
C1 N1 C2 C3 -5.5(6) . . . . ? 
Cu1 N1 C2 C3 178.3(3) . . . . ? 
N1 C2 C3 C4 -8.0(6) . . . . ? 
N1 C2 C3 C5 169.0(4) . . . . ? 
C1 N2 C4 C3 -6.3(6) . . . . ? 
C1 N2 C4 C11 172.7(3) . . . . ? 
C2 C3 C4 N2 14.0(6) . . . . ? 
C5 C3 C4 N2 -162.8(4) . . . . ? 
C2 C3 C4 C11 -164.9(4) . . . . ? 
C5 C3 C4 C11 18.3(6) . . . . ? 
C2 C3 C5 C6 42.8(6) . . . . ? 
C4 C3 C5 C6 -140.5(4) . . . . ? 
C2 C3 C5 C10 -132.0(4) . . . . ? 
C4 C3 C5 C10 44.8(6) . . . . ? 
C10 C5 C6 C7 2.3(7) . . . . ? 
C3 C5 C6 C7 -172.6(4) . . . . ? 
C5 C6 C7 C8 -1.5(7) . . . . ? 
C6 C7 C8 C9 0.2(8) . . . . ? 
C7 C8 C9 C10 0.4(8) . . . . ? 
C8 C9 C10 C5 0.4(7) . . . . ? 
C6 C5 C10 C9 -1.7(7) . . . . ? 
C3 C5 C10 C9 173.1(4) . . . . ? 
N2 C4 C11 C16 30.4(6) . . . . ? 
C3 C4 C11 C16 -150.7(4) . . . . ? 
N2 C4 C11 C12 -146.2(4) . . . . ? 
C3 C4 C11 C12 32.7(6) . . . . ? 
C16 C11 C12 C13 0.2(7) . . . . ? 
C4 C11 C12 C13 176.9(4) . . . . ? 
C11 C12 C13 C14 1.1(7) . . . . ? 
C12 C13 C14 C15 -1.3(8) . . . . ? 
C13 C14 C15 C16 0.2(9) . . . . ? 
C12 C11 C16 C15 -1.3(7) . . . . ? 
C4 C11 C16 C15 -177.9(4) . . . . ? 
C14 C15 C16 C11 1.1(8) . . . . ? 
C20 N4 C17 N3 1.0(6) . . . . ? 
C20 N4 C17 S2 -179.1(3) . . . . ? 
C18 N3 C17 N4 0.1(6) . . . . ? 
Cu3 N3 C17 N4 170.1(3) . . . . ? 
C18 N3 C17 S2 -179.8(3) . . . . ? 
Cu3 N3 C17 S2 -9.8(4) . . . . ? 
Cu2 S2 C17 N4 148.3(3) 2_567 . . . ? 
Cu1 S2 C17 N4 -122.5(3) . . . . ? 
Cu2 S2 C17 N3 -31.7(3) 2_567 . . . ? 
Cu1 S2 C17 N3 57.5(3) . . . . ? 
C17 N3 C18 C19 -0.1(6) . . . . ? 
Cu3 N3 C18 C19 -169.9(3) . . . . ? 
N3 C18 C19 C20 -0.9(6) . . . . ? 
N3 C18 C19 C21 176.3(4) . . . . ? 
C17 N4 C20 C19 -2.1(6) . . . . ? 
C17 N4 C20 C27 176.4(4) . . . . ? 
C18 C19 C20 N4 2.1(6) . . . . ? 
C21 C19 C20 N4 -174.9(4) . . . . ? 
C18 C19 C20 C27 -176.3(4) . . . . ? 
C21 C19 C20 C27 6.7(7) . . . . ? 
C18 C19 C21 C22 -129.0(5) . . . . ? 
C20 C19 C21 C22 47.9(6) . . . . ? 
C18 C19 C21 C26 45.7(6) . . . . ? 
C20 C19 C21 C26 -137.4(5) . . . . ? 
C26 C21 C22 C23 -1.2(7) . . . . ? 
C19 C21 C22 C23 173.5(4) . . . . ? 
C21 C22 C23 C24 0.6(8) . . . . ? 
C22 C23 C24 C25 0.3(8) . . . . ? 
C23 C24 C25 C26 -0.6(8) . . . . ? 
C24 C25 C26 C21 0.0(8) . . . . ? 
C22 C21 C26 C25 0.9(7) . . . . ? 
C19 C21 C26 C25 -173.8(4) . . . . ? 
N4 C20 C27 C32 -126.4(5) . . . . ? 
C19 C20 C27 C32 52.1(6) . . . . ? 
N4 C20 C27 C28 51.4(6) . . . . ? 
C19 C20 C27 C28 -130.1(5) . . . . ? 
C32 C27 C28 C29 -0.4(7) . . . . ? 
C20 C27 C28 C29 -178.2(4) . . . . ? 
C27 C28 C29 C30 1.9(7) . . . . ? 
C28 C29 C30 C31 -1.4(8) . . . . ? 
C29 C30 C31 C32 -0.6(8) . . . . ? 
C28 C27 C32 C31 -1.6(7) . . . . ? 
C20 C27 C32 C31 176.2(5) . . . . ? 
C30 C31 C32 C27 2.1(8) . . . . ? 
C36 N6 C33 N5 -8.6(6) . . . . ? 
C36 N6 C33 S3 170.2(3) . . . . ? 
C34 N5 C33 N6 14.7(6) . . . . ? 
Cu2 N5 C33 N6 -164.0(3) . . . . ? 
C34 N5 C33 S3 -164.2(3) . . . . ? 
Cu2 N5 C33 S3 17.2(4) . . . . ? 
Cu1 S3 C33 N6 122.9(3) . . . . ? 
Cu3 S3 C33 N6 -148.5(3) 2_567 . . . ? 
Cu1 S3 C33 N5 -58.2(3) . . . . ? 
Cu3 S3 C33 N5 30.4(3) 2_567 . . . ? 
C33 N5 C34 C35 -5.2(6) . . . . ? 
Cu2 N5 C34 C35 173.3(3) . . . . ? 
N5 C34 C35 C36 -9.0(6) . . . . ? 
N5 C34 C35 C37 166.9(4) . . . . ? 
C33 N6 C36 C35 -7.1(6) . . . . ? 
C33 N6 C36 C43 170.7(4) . . . . ? 
C34 C35 C36 N6 15.2(6) . . . . ? 
C37 C35 C36 N6 -160.4(4) . . . . ? 
C34 C35 C36 C43 -162.4(4) . . . . ? 
C37 C35 C36 C43 22.0(7) . . . . ? 
C34 C35 C37 C38 40.5(6) . . . . ? 
C36 C35 C37 C38 -144.1(5) . . . . ? 
C34 C35 C37 C42 -133.6(4) . . . . ? 
C36 C35 C37 C42 41.9(6) . . . . ? 
C42 C37 C38 C39 -0.7(7) . . . . ? 
C35 C37 C38 C39 -174.7(4) . . . . ? 
C37 C38 C39 C40 1.2(8) . . . . ? 
C38 C39 C40 C41 -0.9(8) . . . . ? 
C39 C40 C41 C42 0.1(8) . . . . ? 
C38 C37 C42 C41 -0.1(7) . . . . ? 
C35 C37 C42 C41 174.1(4) . . . . ? 
C40 C41 C42 C37 0.4(7) . . . . ? 
N6 C36 C43 C48 27.6(6) . . . . ? 
C35 C36 C43 C48 -154.7(4) . . . . ? 
N6 C36 C43 C44 -146.9(4) . . . . ? 
C35 C36 C43 C44 30.8(6) . . . . ? 
C48 C43 C44 C45 -0.9(6) . . . . ? 
C36 C43 C44 C45 173.7(4) . . . . ? 
C43 C44 C45 C46 0.5(7) . . . . ? 
C44 C45 C46 C47 0.5(7) . . . . ? 
C45 C46 C47 C48 -1.1(7) . . . . ? 
C46 C47 C48 C43 0.7(7) . . . . ? 
C44 C43 C48 C47 0.3(7) . . . . ? 
C36 C43 C48 C47 -174.4(4) . . . . ? 
Cl2A C50 Cl3A Cl3A 25(7) . . . 2_656 ? 
Cl2B C50 Cl3A Cl3A 13(7) . . . 2_656 ? 
Cl3 C50 Cl3A Cl3A 30(7) . . . 2_656 ? 
Cl1 C50 Cl3A Cl3A 148(7) . . . 2_656 ? 
Cl3B C50 Cl3A Cl3A 35(6) . . . 2_656 ? 
Cl2 C50 Cl3A Cl3A -2(7) . . . 2_656 ? 
 
_diffrn_measured_fraction_theta_max    0.990 
_diffrn_reflns_theta_full              28.36 
_diffrn_measured_fraction_theta_full   0.990 
_refine_diff_density_max    1.543 
_refine_diff_density_min   -1.759 
_refine_diff_density_rms    0.119 


#===END 
 
 
data_1i 
 
_audit_creation_method            SHELXL-97 
_chemical_name_systematic 
; 
 ? 
; 
_chemical_name_common             ? 
_chemical_melting_point           ? 
_chemical_formula_moiety         
 'C96 H66 Cu6 N12 S6' 
_chemical_formula_sum 
 'C96 H66 Cu6 N12 S6' 
_chemical_formula_weight          1961.21 
 
loop_ 
 _atom_type_symbol 
 _atom_type_description 
 _atom_type_scat_dispersion_real 
 _atom_type_scat_dispersion_imag 
 _atom_type_scat_source 
 'C'  'C'   0.0033   0.0016 
 'International Tables Vol C Tables 4.2.6.8 and 6.1.1.4' 
 'H'  'H'   0.0000   0.0000 
 'International Tables Vol C Tables 4.2.6.8 and 6.1.1.4' 
 'N'  'N'   0.0061   0.0033 
 'International Tables Vol C Tables 4.2.6.8 and 6.1.1.4' 
 'S'  'S'   0.1246   0.1234 
 'International Tables Vol C Tables 4.2.6.8 and 6.1.1.4' 
 'Cu'  'Cu'   0.3201   1.2651 
 'International Tables Vol C Tables 4.2.6.8 and 6.1.1.4' 
 
_symmetry_cell_setting             monoclinic 
_symmetry_space_group_name_H-M    'P 21/c' 
_symmetry_space_group_name_Hall    '-P 2ybc'
 
loop_ 
 _symmetry_equiv_pos_as_xyz 
 'x, y, z' 
 '-x, y+1/2, -z+1/2' 
 '-x, -y, -z' 
 'x, -y-1/2, z-1/2' 
 
_cell_length_a                    11.498(2) 
_cell_length_b                    16.850(3) 
_cell_length_c                    22.074(4) 
_cell_angle_alpha                 90.00 
_cell_angle_beta                  99.51(3) 
_cell_angle_gamma                 90.00 
_cell_volume                      4217.8(15) 
_cell_formula_units_Z             2 
_cell_measurement_temperature     293(2) 
_cell_measurement_reflns_used     9848 
_cell_measurement_theta_min       3.0122 
_cell_measurement_theta_max       27.5243 
 
_exptl_crystal_description        'Block' 
_exptl_crystal_colour             'Orange' 
_exptl_crystal_size_max           0.37 
_exptl_crystal_size_mid           0.30 
_exptl_crystal_size_min           0.20 
_exptl_crystal_density_meas       ? 
_exptl_crystal_density_diffrn     1.544 
_exptl_crystal_density_method     'not measured' 
_exptl_crystal_F_000              1992 
_exptl_absorpt_coefficient_mu     1.691 
_exptl_absorpt_correction_type    Multi-scan 
_exptl_absorpt_correction_T_min   0.7347 
_exptl_absorpt_correction_T_max   1.0000 
_exptl_absorpt_process_details    
'Jacobson, R. (1998) Private communication' 
 
_exptl_special_details 
; 
 ? 
; 
 
_diffrn_ambient_temperature       293(2) 
_diffrn_radiation_wavelength      0.71073 
_diffrn_radiation_type            MoK\a 
_diffrn_radiation_source          'fine-focus sealed tube' 
_diffrn_radiation_monochromator   graphite 
_diffrn_measurement_device_type   'Rigaku Saturn'
_diffrn_measurement_method         \w 
_diffrn_detector_area_resol_mean  0 
_diffrn_standards_number          0 
_diffrn_standards_interval_count  0 
_diffrn_standards_interval_time   0 
_diffrn_standards_decay_%         0 
_diffrn_reflns_number             23919 
_diffrn_reflns_av_R_equivalents   0.0423 
_diffrn_reflns_av_sigmaI/netI     0.0629 
_diffrn_reflns_limit_h_min        -14 
_diffrn_reflns_limit_h_max        13 
_diffrn_reflns_limit_k_min        -21 
_diffrn_reflns_limit_k_max        15 
_diffrn_reflns_limit_l_min        -24 
_diffrn_reflns_limit_l_max        28 
_diffrn_reflns_theta_min          3.01 
_diffrn_reflns_theta_max          27.48 
_reflns_number_total              9574 
_reflns_number_gt                 6799 
_reflns_threshold_expression      >2sigma(I) 
 
_computing_data_collection        'CrystalClear'
_computing_cell_refinement        'CrystalClear'
_computing_data_reduction         'CrystalStructure' 
_computing_structure_solution     'SHELXS-97 (Sheldrick, 1990)' 
_computing_structure_refinement   'SHELXL-97 (Sheldrick, 1997)' 
_computing_molecular_graphics     ? 
_computing_publication_material   ? 
 
_refine_special_details 
; 
 Refinement of F^2^ against ALL reflections.  The weighted R-factor wR and 
 goodness of fit S are based on F^2^, conventional R-factors R are based 
 on F, with F set to zero for negative F^2^. The threshold expression of 
 F^2^ > 2sigma(F^2^) is used only for calculating R-factors(gt) etc. and is 
 not relevant to the choice of reflections for refinement.  R-factors based 
 on F^2^ are statistically about twice as large as those based on F, and R- 
 factors based on ALL data will be even larger. 
; 
 
_refine_ls_structure_factor_coef  Fsqd  
_refine_ls_matrix_type            full 
_refine_ls_weighting_scheme       calc  
_refine_ls_weighting_details 
 'calc w=1/[\s^2^(Fo^2^)+(0.0413P)^2^+3.1781P] where P=(Fo^2^+2Fc^2^)/3' 
_atom_sites_solution_primary      direct 
_atom_sites_solution_secondary    difmap 
_atom_sites_solution_hydrogens    geom 
_refine_ls_hydrogen_treatment     constr 
_refine_ls_extinction_method      none 
_refine_ls_extinction_coef        ? 
_refine_ls_number_reflns          9574 
_refine_ls_number_parameters      605 
_refine_ls_number_restraints      2 
_refine_ls_R_factor_all           0.1049 
_refine_ls_R_factor_gt            0.0701 
_refine_ls_wR_factor_ref          0.1394 
_refine_ls_wR_factor_gt           0.1231 
_refine_ls_goodness_of_fit_ref    1.127 
_refine_ls_restrained_S_all       1.127 
_refine_ls_shift/su_max           0.001 
_refine_ls_shift/su_mean          0.000 
 
loop_ 
 _atom_site_label 
 _atom_site_type_symbol 
 _atom_site_fract_x 
 _atom_site_fract_y 
 _atom_site_fract_z 
 _atom_site_U_iso_or_equiv 
 _atom_site_adp_type 
 _atom_site_occupancy 
 _atom_site_symmetry_multiplicity 
 _atom_site_calc_flag 
 _atom_site_refinement_flags 
 _atom_site_disorder_assembly 
 _atom_site_disorder_group 
Cu1 Cu 0.85005(4) 0.52247(4) 0.54784(2) 0.04999(17) Uani 1 1 d . . . 
Cu2 Cu 1.05639(5) 0.42425(4) 0.57792(3) 0.05875(19) Uani 1 1 d . . . 
Cu3 Cu 0.95950(5) 0.38070(4) 0.46212(2) 0.05651(18) Uani 1 1 d . . . 
S1 S 1.09203(9) 0.54644(8) 0.62334(5) 0.0490(3) Uani 1 1 d . . . 
S2 S 1.20015(9) 0.38820(8) 0.52717(5) 0.0499(3) Uani 1 1 d . . . 
S3 S 0.82078(9) 0.39445(8) 0.52268(5) 0.0483(3) Uani 1 1 d . . . 
N1 N 0.8665(3) 0.5437(2) 0.63880(14) 0.0451(9) Uani 1 1 d . . . 
N2 N 1.0118(3) 0.5543(2) 0.72904(14) 0.0473(9) Uani 1 1 d . . . 
N3 N 1.0636(3) 0.2839(2) 0.45763(16) 0.0503(9) Uani 1 1 d . . . 
N4 N 1.2679(3) 0.2515(3) 0.48592(18) 0.0583(11) Uani 1 1 d . . . 
N5 N 0.9638(3) 0.3444(2) 0.62334(15) 0.0481(9) Uani 1 1 d . . . 
N6 N 0.7652(3) 0.2957(2) 0.60600(16) 0.0498(9) Uani 1 1 d . . . 
C1 C 0.9794(3) 0.5496(3) 0.66835(17) 0.0448(10) Uani 1 1 d . . . 
C2 C 0.7813(3) 0.5386(3) 0.67381(18) 0.0456(11) Uani 1 1 d . . . 
C3 C 0.8097(4) 0.5399(3) 0.73735(18) 0.0495(11) Uani 1 1 d . . . 
H3 H 0.7514 0.5341 0.7617 0.059 Uiso 1 1 calc R . . 
C4 C 0.9259(4) 0.5500(3) 0.76370(18) 0.0472(11) Uani 1 1 d . C . 
C5 C 0.9624(4) 0.5605(3) 0.83079(18) 0.0552(12) Uani 1 1 d . . . 
C6 C 1.0795(4) 0.5563(3) 0.85686(19) 0.0610(14) Uani 1 1 d . C . 
H6 H 1.1359 0.5450 0.8323 0.073 Uiso 1 1 calc R . . 
C7 C 1.1142(5) 0.5687(4) 0.9192(2) 0.0789(18) Uani 1 1 d . . . 
H7 H 1.1936 0.5650 0.9361 0.095 Uiso 1 1 calc R C . 
C8 C 1.0343(6) 0.5862(5) 0.9556(2) 0.106(3) Uani 1 1 d . C . 
H8 H 1.0566 0.5871 0.9980 0.127 Uiso 1 1 calc R A 1 
C11 C 0.6569(3) 0.5324(3) 0.64211(18) 0.0433(10) Uani 1 1 d . . . 
C12 C 0.5822(4) 0.4769(3) 0.6603(2) 0.0637(14) Uani 1 1 d . . . 
H12 H 0.6101 0.4420 0.6920 0.076 Uiso 1 1 calc R . . 
C13 C 0.4662(4) 0.4722(4) 0.6319(3) 0.0773(17) Uani 1 1 d . . . 
H13 H 0.4168 0.4335 0.6436 0.093 Uiso 1 1 calc R . . 
C14 C 0.4240(4) 0.5251(4) 0.5861(2) 0.0707(15) Uani 1 1 d . . . 
H14 H 0.3453 0.5229 0.5677 0.085 Uiso 1 1 calc R . . 
C15 C 0.4972(4) 0.5814(3) 0.5673(2) 0.0609(13) Uani 1 1 d . . . 
H15 H 0.4684 0.6173 0.5365 0.073 Uiso 1 1 calc R . . 
C16 C 0.6144(4) 0.5838(3) 0.59499(19) 0.0532(12) Uani 1 1 d . . . 
H16 H 0.6651 0.6204 0.5816 0.064 Uiso 1 1 calc R . . 
C17 C 1.1743(4) 0.2978(3) 0.48754(19) 0.0511(11) Uani 1 1 d . . . 
C18 C 1.0466(4) 0.2162(3) 0.4243(2) 0.0552(12) Uani 1 1 d . . . 
C19 C 1.1410(5) 0.1647(3) 0.4211(2) 0.0656(14) Uani 1 1 d . . . 
H19 H 1.1294 0.1177 0.3988 0.079 Uiso 1 1 calc R . . 
C20 C 1.2527(4) 0.1850(3) 0.4522(2) 0.0595(13) Uani 1 1 d . . . 
C21 C 1.3604(5) 0.1382(4) 0.4496(3) 0.0697(15) Uani 1 1 d . . . 
C22 C 1.4664(5) 0.1619(5) 0.4827(3) 0.097(2) Uani 1 1 d . . . 
H22 H 1.4693 0.2063 0.5080 0.116 Uiso 1 1 calc R . . 
C23 C 1.5698(7) 0.1204(6) 0.4789(4) 0.128(3) Uani 1 1 d . . . 
H23 H 1.6411 0.1378 0.5011 0.154 Uiso 1 1 calc R . . 
C24 C 1.5672(8) 0.0541(6) 0.4425(4) 0.122(3) Uani 1 1 d . . . 
H24 H 1.6361 0.0261 0.4403 0.146 Uiso 1 1 calc R . . 
C25 C 1.4637(8) 0.0301(5) 0.4099(4) 0.116(3) Uani 1 1 d . . . 
H25 H 1.4613 -0.0148 0.3853 0.140 Uiso 1 1 calc R . . 
C26 C 1.3593(6) 0.0722(4) 0.4129(3) 0.096(2) Uani 1 1 d . . . 
H26 H 1.2887 0.0553 0.3897 0.115 Uiso 1 1 calc R . . 
C27 C 0.9269(4) 0.2003(3) 0.3908(2) 0.0573(12) Uani 1 1 d . . . 
C28 C 0.8275(4) 0.2285(4) 0.4115(3) 0.0768(17) Uani 1 1 d . . . 
H28 H 0.8355 0.2556 0.4486 0.092 Uiso 1 1 calc R . . 
C29 C 0.7167(5) 0.2170(4) 0.3776(3) 0.096(2) Uani 1 1 d . . . 
H29 H 0.6511 0.2369 0.3922 0.116 Uiso 1 1 calc R . . 
C30 C 0.7017(5) 0.1770(4) 0.3234(3) 0.0872(19) Uani 1 1 d . . . 
H30 H 0.6266 0.1698 0.3008 0.105 Uiso 1 1 calc R . . 
C31 C 0.7984(5) 0.1475(4) 0.3024(3) 0.0838(18) Uani 1 1 d . . . 
H31 H 0.7887 0.1198 0.2655 0.101 Uiso 1 1 calc R . . 
C32 C 0.9105(5) 0.1583(3) 0.3352(2) 0.0707(15) Uani 1 1 d . . . 
H32 H 0.9753 0.1375 0.3204 0.085 Uiso 1 1 calc R . . 
C33 C 0.8527(3) 0.3390(3) 0.59111(18) 0.0463(11) Uani 1 1 d . . . 
C34 C 0.9876(4) 0.2993(3) 0.67457(19) 0.0515(11) Uani 1 1 d . C . 
C35 C 0.9012(4) 0.2521(3) 0.6921(2) 0.0595(13) Uani 1 1 d . . . 
H35 H 0.9183 0.2202 0.7267 0.071 Uiso 1 1 calc R . . 
C36 C 0.7895(4) 0.2523(3) 0.6582(2) 0.0547(12) Uani 1 1 d . C . 
C37 C 0.6882(4) 0.2093(3) 0.6766(2) 0.0650(14) Uani 1 1 d D . . 
C40 C 0.4967(7) 0.1368(6) 0.7154(4) 0.126(3) Uani 1 1 d . . . 
H40 H 0.4337 0.1075 0.7250 0.151 Uiso 1 1 calc R B 1 
C41 C 0.6088(7) 0.1195(4) 0.7447(3) 0.099(2) Uani 1 1 d . C . 
H41 H 0.6201 0.0837 0.7772 0.118 Uiso 1 1 calc R . . 
C42 C 0.7042(5) 0.1553(4) 0.7258(3) 0.0781(17) Uani 1 1 d . C . 
H42 H 0.7800 0.1435 0.7457 0.094 Uiso 1 1 calc R . . 
C43 C 1.1085(4) 0.3043(4) 0.7123(2) 0.0609(14) Uani 1 1 d . . . 
C9 C 0.9162(14) 0.6030(10) 0.9288(6) 0.107(5) Uani 0.738(10) 1 d P C 1 
H9 H 0.8624 0.6234 0.9518 0.129 Uiso 0.738(10) 1 calc PR C 1 
C10 C 0.8847(12) 0.5876(9) 0.8662(5) 0.081(4) Uani 0.738(10) 1 d P C 1 
H10 H 0.8070 0.5963 0.8479 0.097 Uiso 0.738(10) 1 calc PR C 1 
C9A C 0.923(3) 0.558(2) 0.9354(13) 0.072(10) Uani 0.262(10) 1 d P C 2 
H9A H 0.8767 0.5441 0.9645 0.087 Uiso 0.262(10) 1 calc PR C 2 
C10A C 0.878(4) 0.548(2) 0.8756(18) 0.071(10) Uani 0.262(10) 1 d P C 2 
H10A H 0.7999 0.5340 0.8626 0.085 Uiso 0.262(10) 1 calc PR C 2 
C38 C 0.5730(7) 0.2338(6) 0.6509(5) 0.075(3) Uani 0.738(10) 1 d P C 1 
H38 H 0.5632 0.2730 0.6208 0.090 Uiso 0.738(10) 1 calc PR C 1 
C39 C 0.4737(9) 0.2003(7) 0.6696(6) 0.092(3) Uani 0.738(10) 1 d P C 1 
H39 H 0.3976 0.2172 0.6540 0.111 Uiso 0.738(10) 1 calc PR C 1 
C38A C 0.5793(16) 0.2052(19) 0.6381(12) 0.075(3) Uani 0.262(10) 1 d PD C 2 
H38A H 0.5630 0.2321 0.6008 0.090 Uiso 0.262(10) 1 calc PR C 2 
C39A C 0.497(3) 0.1571(19) 0.6604(19) 0.092(3) Uani 0.262(10) 1 d PD C 2 
H39A H 0.4349 0.1380 0.6316 0.111 Uiso 0.262(10) 1 calc PR C 2 
C44 C 1.1746(6) 0.3766(5) 0.7161(3) 0.068(2) Uani 0.738(10) 1 d P C 1 
H44 H 1.1440 0.4209 0.6938 0.081 Uiso 0.738(10) 1 calc PR C 1 
C45 C 1.2855(6) 0.3805(6) 0.7532(4) 0.083(3) Uani 0.738(10) 1 d P C 1 
H45 H 1.3297 0.4268 0.7537 0.100 Uiso 0.738(10) 1 calc PR C 1 
C46 C 1.3295(11) 0.3186(7) 0.7884(5) 0.067(3) Uani 0.738(10) 1 d P C 1 
H46 H 1.4028 0.3219 0.8135 0.080 Uiso 0.738(10) 1 calc PR C 1 
C47 C 1.262(2) 0.2491(11) 0.7860(8) 0.073(5) Uani 0.738(10) 1 d P C 1 
H47 H 1.2915 0.2052 0.8089 0.088 Uiso 0.738(10) 1 calc PR C 1 
C48 C 1.1547(10) 0.2448(7) 0.7515(6) 0.070(3) Uani 0.738(10) 1 d P C 1 
H48 H 1.1096 0.1995 0.7541 0.084 Uiso 0.738(10) 1 calc PR C 1 
C44A C 1.2016(18) 0.307(2) 0.6815(14) 0.114(15) Uani 0.262(10) 1 d P C 2 
H44A H 1.1892 0.3163 0.6394 0.137 Uiso 0.262(10) 1 calc PR C 2 
C45A C 1.315(2) 0.295(2) 0.7131(15) 0.127(15) Uani 0.262(10) 1 d P C 2 
H45A H 1.3792 0.2999 0.6924 0.153 Uiso 0.262(10) 1 calc PR C 2 
C46A C 1.334(3) 0.278(2) 0.7727(17) 0.078(11) Uani 0.262(10) 1 d P C 2 
H46A H 1.4106 0.2786 0.7940 0.094 Uiso 0.262(10) 1 calc PR C 2 
C47A C 1.249(8) 0.260(4) 0.802(3) 0.09(2) Uani 0.262(10) 1 d P C 2 
H47A H 1.2627 0.2451 0.8433 0.105 Uiso 0.262(10) 1 calc PR C 2 
C48A C 1.124(4) 0.264(2) 0.765(2) 0.070(3) Uani 0.262(10) 1 d P C 2 
H48A H 1.0613 0.2386 0.7789 0.084 Uiso 0.262(10) 1 calc PR C 2 
 
loop_ 
 _atom_site_aniso_label 
 _atom_site_aniso_U_11 
 _atom_site_aniso_U_22 
 _atom_site_aniso_U_33 
 _atom_site_aniso_U_23 
 _atom_site_aniso_U_13 
 _atom_site_aniso_U_12 
Cu1 0.0449(3) 0.0651(4) 0.0375(3) -0.0024(3) -0.0006(2) -0.0036(3) 
Cu2 0.0459(3) 0.0731(5) 0.0592(4) -0.0054(3) 0.0145(3) -0.0080(3) 
Cu3 0.0442(3) 0.0754(5) 0.0497(3) 0.0057(3) 0.0070(2) 0.0017(3) 
S1 0.0350(5) 0.0732(9) 0.0383(5) -0.0012(5) 0.0044(4) -0.0036(5) 
S2 0.0415(6) 0.0646(8) 0.0423(5) 0.0006(5) 0.0034(4) -0.0024(5) 
S3 0.0414(6) 0.0631(8) 0.0386(5) 0.0017(5) 0.0009(4) -0.0025(5) 
N1 0.0324(17) 0.061(3) 0.0405(18) -0.0061(17) 0.0026(14) -0.0026(16) 
N2 0.0391(18) 0.065(3) 0.0357(17) -0.0051(17) -0.0002(14) -0.0021(17) 
N3 0.045(2) 0.055(3) 0.050(2) -0.0032(19) 0.0062(16) -0.0002(18) 
N4 0.056(2) 0.063(3) 0.056(2) 0.013(2) 0.0094(18) 0.006(2) 
N5 0.0391(18) 0.062(3) 0.0422(19) 0.0052(18) 0.0036(15) -0.0004(17) 
N6 0.046(2) 0.055(3) 0.049(2) 0.0032(19) 0.0119(16) -0.0049(18) 
C1 0.040(2) 0.056(3) 0.036(2) -0.005(2) 0.0006(17) -0.001(2) 
C2 0.038(2) 0.058(3) 0.040(2) -0.004(2) 0.0031(17) 0.001(2) 
C3 0.041(2) 0.068(3) 0.040(2) -0.004(2) 0.0098(18) 0.000(2) 
C4 0.045(2) 0.057(3) 0.038(2) -0.002(2) 0.0024(18) 0.003(2) 
C5 0.055(3) 0.074(4) 0.035(2) -0.009(2) 0.0018(19) 0.004(2) 
C6 0.056(3) 0.083(4) 0.040(2) -0.004(2) -0.004(2) 0.003(3) 
C7 0.073(3) 0.108(5) 0.047(3) -0.007(3) -0.012(3) 0.003(3) 
C8 0.105(5) 0.167(8) 0.040(3) -0.027(4) -0.005(3) 0.023(5) 
C11 0.033(2) 0.057(3) 0.041(2) -0.006(2) 0.0081(17) -0.0004(19) 
C12 0.050(3) 0.068(4) 0.068(3) 0.011(3) -0.006(2) -0.005(3) 
C13 0.056(3) 0.077(4) 0.093(4) 0.018(3) -0.006(3) -0.024(3) 
C14 0.045(3) 0.082(4) 0.077(3) 0.004(3) -0.012(2) -0.007(3) 
C15 0.047(3) 0.075(4) 0.055(3) 0.008(3) -0.006(2) 0.003(3) 
C16 0.044(2) 0.064(3) 0.050(2) 0.003(2) 0.0048(19) 0.000(2) 
C17 0.048(2) 0.057(3) 0.048(2) 0.012(2) 0.007(2) -0.001(2) 
C18 0.056(3) 0.059(3) 0.052(3) 0.005(2) 0.010(2) -0.002(2) 
C19 0.074(3) 0.060(4) 0.063(3) -0.004(3) 0.011(3) 0.007(3) 
C20 0.061(3) 0.063(4) 0.056(3) 0.014(3) 0.014(2) 0.004(3) 
C21 0.071(4) 0.072(4) 0.069(3) 0.021(3) 0.022(3) 0.023(3) 
C22 0.075(4) 0.112(6) 0.101(5) 0.016(4) 0.007(4) 0.036(4) 
C23 0.091(5) 0.156(9) 0.135(7) 0.023(7) 0.011(5) 0.059(6) 
C24 0.100(6) 0.130(8) 0.145(8) 0.048(6) 0.048(6) 0.052(6) 
C25 0.133(7) 0.092(6) 0.139(7) 0.018(5) 0.063(6) 0.047(5) 
C26 0.094(5) 0.091(5) 0.111(5) 0.000(4) 0.038(4) 0.022(4) 
C27 0.058(3) 0.047(3) 0.066(3) -0.004(2) 0.009(2) -0.003(2) 
C28 0.061(3) 0.080(4) 0.089(4) -0.027(3) 0.013(3) -0.016(3) 
C29 0.060(3) 0.110(6) 0.119(5) -0.038(5) 0.014(3) -0.023(4) 
C30 0.065(4) 0.088(5) 0.103(5) -0.021(4) -0.004(3) -0.019(3) 
C31 0.083(4) 0.084(5) 0.078(4) -0.012(3) -0.007(3) -0.019(4) 
C32 0.073(3) 0.063(4) 0.076(3) -0.004(3) 0.012(3) -0.002(3) 
C33 0.040(2) 0.058(3) 0.041(2) 0.002(2) 0.0062(17) -0.003(2) 
C34 0.048(2) 0.062(3) 0.044(2) 0.008(2) 0.0074(19) 0.005(2) 
C35 0.058(3) 0.071(4) 0.049(3) 0.014(2) 0.007(2) -0.003(3) 
C36 0.056(3) 0.055(3) 0.056(3) -0.002(2) 0.019(2) -0.007(2) 
C37 0.067(3) 0.067(4) 0.065(3) -0.004(3) 0.024(3) -0.018(3) 
C40 0.108(6) 0.149(9) 0.132(7) 0.001(6) 0.054(5) -0.067(6) 
C41 0.104(5) 0.097(6) 0.106(5) 0.010(4) 0.052(4) -0.025(4) 
C42 0.081(4) 0.072(4) 0.088(4) 0.009(3) 0.034(3) -0.005(3) 
C43 0.045(3) 0.092(4) 0.045(2) 0.014(3) 0.004(2) 0.002(3) 
C9 0.103(8) 0.154(15) 0.062(7) -0.022(9) 0.006(6) 0.054(10) 
C10 0.065(6) 0.145(14) 0.032(5) -0.010(7) 0.006(4) 0.015(8) 
C9A 0.090(19) 0.11(3) 0.021(9) 0.009(14) 0.015(10) 0.051(19) 
C10A 0.079(17) 0.09(3) 0.050(15) 0.016(15) 0.021(12) -0.017(18) 
C38 0.066(4) 0.076(8) 0.084(6) -0.008(5) 0.017(4) -0.025(4) 
C39 0.063(5) 0.081(9) 0.139(8) -0.001(8) 0.038(5) -0.013(5) 
C38A 0.066(4) 0.076(8) 0.084(6) -0.008(5) 0.017(4) -0.025(4) 
C39A 0.063(5) 0.081(9) 0.139(8) -0.001(8) 0.038(5) -0.013(5) 
C44 0.057(4) 0.066(6) 0.073(5) 0.024(4) -0.009(4) -0.014(4) 
C45 0.066(5) 0.095(7) 0.076(5) 0.040(5) -0.022(4) -0.021(5) 
C46 0.059(5) 0.078(8) 0.060(5) -0.006(6) -0.002(4) -0.003(6) 
C47 0.089(10) 0.048(8) 0.067(11) 0.013(8) -0.031(9) 0.011(7) 
C48 0.075(8) 0.040(7) 0.085(8) 0.010(5) -0.016(5) 0.002(4) 
C44A 0.045(12) 0.19(4) 0.11(2) 0.08(2) -0.004(12) 0.008(16) 
C45A 0.046(13) 0.20(4) 0.13(3) 0.05(3) -0.014(14) -0.010(17) 
C46A 0.052(15) 0.08(3) 0.09(3) 0.022(19) -0.032(17) -0.020(19) 
C47A 0.10(4) 0.09(3) 0.05(2) -0.035(18) -0.03(2) 0.01(2) 
C48A 0.075(8) 0.040(7) 0.085(8) 0.010(5) -0.016(5) 0.002(4) 
 
_geom_special_details 
; 
 All esds (except the esd in the dihedral angle between two l.s. planes) 
 are estimated using the full covariance matrix.  The cell esds are taken 
 into account individually in the estimation of esds in distances, angles 
 and torsion angles; correlations between esds in cell parameters are only 
 used when they are defined by crystal symmetry.  An approximate (isotropic) 
 treatment of cell esds is used for estimating esds involving l.s. planes. 
; 
 
loop_ 
 _geom_bond_atom_site_label_1 
 _geom_bond_atom_site_label_2 
 _geom_bond_distance 
 _geom_bond_site_symmetry_2 
 _geom_bond_publ_flag 
Cu1 N1 2.017(3) . ? 
Cu1 S3 2.2390(15) . ? 
Cu1 S2 2.2415(14) 3_766 ? 
Cu1 Cu3 2.7684(9) 3_766 ? 
Cu1 Cu2 2.8788(10) . ? 
Cu2 N5 2.074(4) . ? 
Cu2 S2 2.2291(13) . ? 
Cu2 S1 2.2969(15) . ? 
Cu2 Cu3 2.7153(11) . ? 
Cu3 N3 2.035(4) . ? 
Cu3 S1 2.2466(13) 3_766 ? 
Cu3 S3 2.2560(13) . ? 
Cu3 Cu1 2.7684(9) 3_766 ? 
S1 C1 1.758(4) . ? 
S1 Cu3 2.2466(13) 3_766 ? 
S2 C17 1.757(5) . ? 
S2 Cu1 2.2415(14) 3_766 ? 
S3 C33 1.762(4) . ? 
N1 C2 1.347(5) . ? 
N1 C1 1.357(5) . ? 
N2 C1 1.332(5) . ? 
N2 C4 1.348(5) . ? 
N3 C17 1.354(5) . ? 
N3 C18 1.354(6) . ? 
N4 C17 1.334(6) . ? 
N4 C20 1.340(7) . ? 
N5 C34 1.352(5) . ? 
N5 C33 1.359(5) . ? 
N6 C33 1.327(5) . ? 
N6 C36 1.354(6) . ? 
C2 C3 1.387(5) . ? 
C2 C11 1.488(5) . ? 
C3 C4 1.377(6) . ? 
C3 H3 0.9300 . ? 
C4 C5 1.482(5) . ? 
C5 C10 1.360(14) . ? 
C5 C6 1.376(6) . ? 
C5 C10A 1.51(4) . ? 
C6 C7 1.383(6) . ? 
C6 H6 0.9300 . ? 
C7 C8 1.350(8) . ? 
C7 H7 0.9300 . ? 
C8 C9A 1.37(4) . ? 
C8 C9 1.418(15) . ? 
C8 H8 0.9300 . ? 
C11 C12 1.375(6) . ? 
C11 C16 1.379(6) . ? 
C12 C13 1.378(6) . ? 
C12 H12 0.9300 . ? 
C13 C14 1.374(7) . ? 
C13 H13 0.9300 . ? 
C14 C15 1.377(7) . ? 
C14 H14 0.9300 . ? 
C15 C16 1.385(6) . ? 
C15 H15 0.9300 . ? 
C16 H16 0.9300 . ? 
C18 C19 1.401(7) . ? 
C18 C27 1.475(6) . ? 
C19 C20 1.395(7) . ? 
C19 H19 0.9300 . ? 
C20 C21 1.478(7) . ? 
C21 C22 1.374(8) . ? 
C21 C26 1.374(9) . ? 
C22 C23 1.394(9) . ? 
C22 H22 0.9300 . ? 
C23 C24 1.374(12) . ? 
C23 H23 0.9300 . ? 
C24 C25 1.346(11) . ? 
C24 H24 0.9300 . ? 
C25 C26 1.406(9) . ? 
C25 H25 0.9300 . ? 
C26 H26 0.9300 . ? 
C27 C28 1.384(7) . ? 
C27 C32 1.401(7) . ? 
C28 C29 1.380(7) . ? 
C28 H28 0.9300 . ? 
C29 C30 1.361(8) . ? 
C29 H29 0.9300 . ? 
C30 C31 1.367(8) . ? 
C30 H30 0.9300 . ? 
C31 C32 1.382(7) . ? 
C31 H31 0.9300 . ? 
C32 H32 0.9300 . ? 
C34 C35 1.376(6) . ? 
C34 C43 1.500(6) . ? 
C35 C36 1.376(6) . ? 
C35 H35 0.9300 . ? 
C36 C37 1.485(6) . ? 
C37 C38A 1.394(10) . ? 
C37 C42 1.405(8) . ? 
C37 C38 1.413(10) . ? 
C40 C39A 1.26(4) . ? 
C40 C41 1.374(10) . ? 
C40 C39 1.466(14) . ? 
C40 H40 0.9300 . ? 
C41 C42 1.375(8) . ? 
C41 H41 0.9300 . ? 
C42 H42 0.9300 . ? 
C43 C48A 1.34(4) . ? 
C43 C44A 1.36(3) . ? 
C43 C48 1.372(13) . ? 
C43 C44 1.431(9) . ? 
C9 C10 1.392(19) . ? 
C9 H9 0.9300 . ? 
C10 H10 0.9300 . ? 
C9A C10A 1.35(6) . ? 
C9A H9A 0.9300 . ? 
C10A H10A 0.9300 . ? 
C38 C39 1.397(11) . ? 
C38 H38 0.9300 . ? 
C39 H39 0.9300 . ? 
C38A C39A 1.400(10) . ? 
C38A H38A 0.9300 . ? 
C39A H39A 0.9300 . ? 
C44 C45 1.399(9) . ? 
C44 H44 0.9300 . ? 
C45 C46 1.347(14) . ? 
C45 H45 0.9300 . ? 
C46 C47 1.40(3) . ? 
C46 H46 0.9300 . ? 
C47 C48 1.34(3) . ? 
C47 H47 0.9300 . ? 
C48 H48 0.9300 . ? 
C44A C45A 1.39(3) . ? 
C44A H44A 0.9300 . ? 
C45A C46A 1.33(4) . ? 
C45A H45A 0.9300 . ? 
C46A C47A 1.30(11) . ? 
C46A H46A 0.9300 . ? 
C47A C48A 1.53(9) . ? 
C47A H47A 0.9300 . ? 
C48A H48A 0.9300 . ? 
 
loop_ 
 _geom_angle_atom_site_label_1 
 _geom_angle_atom_site_label_2 
 _geom_angle_atom_site_label_3 
 _geom_angle 
 _geom_angle_site_symmetry_1 
 _geom_angle_site_symmetry_3 
 _geom_angle_publ_flag 
N1 Cu1 S3 113.77(12) . . ? 
N1 Cu1 S2 125.91(12) . 3_766 ? 
S3 Cu1 S2 117.00(5) . 3_766 ? 
N1 Cu1 Cu3 91.69(10) . 3_766 ? 
S3 Cu1 Cu3 129.53(4) . 3_766 ? 
S2 Cu1 Cu3 69.89(4) 3_766 3_766 ? 
N1 Cu1 Cu2 86.23(10) . . ? 
S3 Cu1 Cu2 65.65(4) . . ? 
S2 Cu1 Cu2 131.17(4) 3_766 . ? 
Cu3 Cu1 Cu2 74.01(3) 3_766 . ? 
N5 Cu2 S2 123.26(11) . . ? 
N5 Cu2 S1 116.07(11) . . ? 
S2 Cu2 S1 111.72(5) . . ? 
N5 Cu2 Cu3 96.67(10) . . ? 
S2 Cu2 Cu3 71.10(4) . . ? 
S1 Cu2 Cu3 131.99(4) . . ? 
N5 Cu2 Cu1 90.89(10) . . ? 
S2 Cu2 Cu1 133.79(4) . . ? 
S1 Cu2 Cu1 70.50(4) . . ? 
Cu3 Cu2 Cu1 75.16(3) . . ? 
N3 Cu3 S1 118.20(11) . 3_766 ? 
N3 Cu3 S3 126.18(11) . . ? 
S1 Cu3 S3 109.10(5) 3_766 . ? 
N3 Cu3 Cu2 96.27(10) . . ? 
S1 Cu3 Cu2 130.77(5) 3_766 . ? 
S3 Cu3 Cu2 68.57(4) . . ? 
N3 Cu3 Cu1 89.37(11) . 3_766 ? 
S1 Cu3 Cu1 73.36(4) 3_766 3_766 ? 
S3 Cu3 Cu1 129.23(4) . 3_766 ? 
Cu2 Cu3 Cu1 73.06(3) . 3_766 ? 
C1 S1 Cu3 109.97(15) . 3_766 ? 
C1 S1 Cu2 100.28(16) . . ? 
Cu3 S1 Cu2 96.89(5) 3_766 . ? 
C17 S2 Cu2 114.09(15) . . ? 
C17 S2 Cu1 102.28(15) . 3_766 ? 
Cu2 S2 Cu1 93.81(5) . 3_766 ? 
C33 S3 Cu1 107.26(16) . . ? 
C33 S3 Cu3 112.70(15) . . ? 
Cu1 S3 Cu3 98.85(5) . . ? 
C2 N1 C1 117.2(3) . . ? 
C2 N1 Cu1 127.1(3) . . ? 
C1 N1 Cu1 114.6(3) . . ? 
C1 N2 C4 117.3(3) . . ? 
C17 N3 C18 116.8(4) . . ? 
C17 N3 Cu3 110.5(3) . . ? 
C18 N3 Cu3 131.9(3) . . ? 
C17 N4 C20 118.2(4) . . ? 
C34 N5 C33 116.3(4) . . ? 
C34 N5 Cu2 136.0(3) . . ? 
C33 N5 Cu2 107.7(3) . . ? 
C33 N6 C36 116.7(4) . . ? 
N2 C1 N1 125.0(4) . . ? 
N2 C1 S1 117.4(3) . . ? 
N1 C1 S1 117.5(3) . . ? 
N1 C2 C3 120.5(4) . . ? 
N1 C2 C11 117.9(3) . . ? 
C3 C2 C11 121.6(4) . . ? 
C4 C3 C2 118.6(4) . . ? 
C4 C3 H3 120.7 . . ? 
C2 C3 H3 120.7 . . ? 
N2 C4 C3 121.2(4) . . ? 
N2 C4 C5 116.6(4) . . ? 
C3 C4 C5 122.2(4) . . ? 
C10 C5 C6 117.8(6) . . ? 
C10 C5 C4 120.7(6) . . ? 
C6 C5 C4 120.5(4) . . ? 
C10 C5 C10A 28.1(16) . . ? 
C6 C5 C10A 114.0(17) . . ? 
C4 C5 C10A 122.1(18) . . ? 
C5 C6 C7 120.7(5) . . ? 
C5 C6 H6 119.7 . . ? 
C7 C6 H6 119.7 . . ? 
C8 C7 C6 120.8(5) . . ? 
C8 C7 H7 119.6 . . ? 
C6 C7 H7 119.6 . . ? 
C7 C8 C9A 114.8(13) . . ? 
C7 C8 C9 119.6(7) . . ? 
C9A C8 C9 32.6(12) . . ? 
C7 C8 H8 120.2 . . ? 
C9A C8 H8 114.9 . . ? 
C9 C8 H8 120.2 . . ? 
C12 C11 C16 119.1(4) . . ? 
C12 C11 C2 120.6(4) . . ? 
C16 C11 C2 120.3(4) . . ? 
C11 C12 C13 120.6(5) . . ? 
C11 C12 H12 119.7 . . ? 
C13 C12 H12 119.7 . . ? 
C14 C13 C12 119.7(5) . . ? 
C14 C13 H13 120.2 . . ? 
C12 C13 H13 120.2 . . ? 
C13 C14 C15 120.6(5) . . ? 
C13 C14 H14 119.7 . . ? 
C15 C14 H14 119.7 . . ? 
C14 C15 C16 119.0(5) . . ? 
C14 C15 H15 120.5 . . ? 
C16 C15 H15 120.5 . . ? 
C11 C16 C15 120.8(5) . . ? 
C11 C16 H16 119.6 . . ? 
C15 C16 H16 119.6 . . ? 
N4 C17 N3 125.7(5) . . ? 
N4 C17 S2 116.7(3) . . ? 
N3 C17 S2 117.4(4) . . ? 
N3 C18 C19 120.4(4) . . ? 
N3 C18 C27 117.8(4) . . ? 
C19 C18 C27 121.9(5) . . ? 
C20 C19 C18 118.7(5) . . ? 
C20 C19 H19 120.6 . . ? 
C18 C19 H19 120.6 . . ? 
N4 C20 C19 120.2(5) . . ? 
N4 C20 C21 115.8(5) . . ? 
C19 C20 C21 124.0(5) . . ? 
C22 C21 C26 118.1(6) . . ? 
C22 C21 C20 120.0(6) . . ? 
C26 C21 C20 121.9(6) . . ? 
C21 C22 C23 120.8(8) . . ? 
C21 C22 H22 119.6 . . ? 
C23 C22 H22 119.6 . . ? 
C24 C23 C22 120.5(9) . . ? 
C24 C23 H23 119.8 . . ? 
C22 C23 H23 119.8 . . ? 
C25 C24 C23 119.2(8) . . ? 
C25 C24 H24 120.4 . . ? 
C23 C24 H24 120.4 . . ? 
C24 C25 C26 120.7(8) . . ? 
C24 C25 H25 119.7 . . ? 
C26 C25 H25 119.7 . . ? 
C21 C26 C25 120.7(8) . . ? 
C21 C26 H26 119.6 . . ? 
C25 C26 H26 119.6 . . ? 
C28 C27 C32 117.6(5) . . ? 
C28 C27 C18 121.6(5) . . ? 
C32 C27 C18 120.7(5) . . ? 
C29 C28 C27 120.8(5) . . ? 
C29 C28 H28 119.6 . . ? 
C27 C28 H28 119.6 . . ? 
C30 C29 C28 121.2(6) . . ? 
C30 C29 H29 119.4 . . ? 
C28 C29 H29 119.4 . . ? 
C29 C30 C31 119.1(6) . . ? 
C29 C30 H30 120.5 . . ? 
C31 C30 H30 120.5 . . ? 
C30 C31 C32 121.0(6) . . ? 
C30 C31 H31 119.5 . . ? 
C32 C31 H31 119.5 . . ? 
C31 C32 C27 120.3(5) . . ? 
C31 C32 H32 119.9 . . ? 
C27 C32 H32 119.9 . . ? 
N6 C33 N5 126.3(4) . . ? 
N6 C33 S3 116.4(3) . . ? 
N5 C33 S3 117.3(3) . . ? 
N5 C34 C35 120.2(4) . . ? 
N5 C34 C43 118.3(4) . . ? 
C35 C34 C43 121.5(4) . . ? 
C36 C35 C34 119.9(4) . . ? 
C36 C35 H35 120.0 . . ? 
C34 C35 H35 120.0 . . ? 
N6 C36 C35 120.4(4) . . ? 
N6 C36 C37 115.9(4) . . ? 
C35 C36 C37 123.7(4) . . ? 
C38A C37 C42 115.5(13) . . ? 
C38A C37 C38 23.3(15) . . ? 
C42 C37 C38 119.7(6) . . ? 
C38A C37 C36 121.5(13) . . ? 
C42 C37 C36 121.3(5) . . ? 
C38 C37 C36 118.2(6) . . ? 
C39A C40 C41 111.2(15) . . ? 
C39A C40 C39 33.5(14) . . ? 
C41 C40 C39 121.9(7) . . ? 
C39A C40 H40 119.1 . . ? 
C41 C40 H40 119.1 . . ? 
C39 C40 H40 119.1 . . ? 
C40 C41 C42 119.9(7) . . ? 
C40 C41 H41 120.1 . . ? 
C42 C41 H41 120.1 . . ? 
C41 C42 C37 120.5(6) . . ? 
C41 C42 H42 119.7 . . ? 
C37 C42 H42 119.7 . . ? 
C48A C43 C44A 117(2) . . ? 
C48A C43 C48 25.1(15) . . ? 
C44A C43 C48 94.8(12) . . ? 
C48A C43 C44 113(2) . . ? 
C44A C43 C44 63.1(16) . . ? 
C48 C43 C44 116.0(7) . . ? 
C48A C43 C34 116(2) . . ? 
C44A C43 C34 117.2(12) . . ? 
C48 C43 C34 122.4(7) . . ? 
C44 C43 C34 121.0(5) . . ? 
C10 C9 C8 116.8(11) . . ? 
C10 C9 H9 121.6 . . ? 
C8 C9 H9 121.6 . . ? 
C5 C10 C9 123.0(12) . . ? 
C5 C10 H10 118.5 . . ? 
C9 C10 H10 118.5 . . ? 
C10A C9A C8 123(3) . . ? 
C10A C9A H9A 118.4 . . ? 
C8 C9A H9A 118.4 . . ? 
C9A C10A C5 116(3) . . ? 
C9A C10A H10A 121.9 . . ? 
C5 C10A H10A 121.9 . . ? 
C39 C38 C37 121.4(9) . . ? 
C39 C38 H38 119.3 . . ? 
C37 C38 H38 119.3 . . ? 
C38 C39 C40 115.8(9) . . ? 
C38 C39 H39 122.1 . . ? 
C40 C39 H39 122.1 . . ? 
C37 C38A C39A 114(2) . . ? 
C37 C38A H38A 123.0 . . ? 
C39A C38A H38A 123.0 . . ? 
C40 C39A C38A 127(3) . . ? 
C40 C39A H39A 116.4 . . ? 
C38A C39A H39A 116.4 . . ? 
C45 C44 C43 119.9(7) . . ? 
C45 C44 H44 120.0 . . ? 
C43 C44 H44 120.0 . . ? 
C46 C45 C44 121.3(9) . . ? 
C46 C45 H45 119.3 . . ? 
C44 C45 H45 119.3 . . ? 
C45 C46 C47 118.1(12) . . ? 
C45 C46 H46 121.0 . . ? 
C47 C46 H46 121.0 . . ? 
C48 C47 C46 121.3(13) . . ? 
C48 C47 H47 119.4 . . ? 
C46 C47 H47 119.4 . . ? 
C47 C48 C43 122.9(14) . . ? 
C47 C48 H48 118.5 . . ? 
C43 C48 H48 118.5 . . ? 
C43 C44A C45A 120(2) . . ? 
C43 C44A H44A 120.1 . . ? 
C45A C44A H44A 120.1 . . ? 
C46A C45A C44A 121(3) . . ? 
C46A C45A H45A 119.7 . . ? 
C44A C45A H45A 119.7 . . ? 
C47A C46A C45A 123(4) . . ? 
C47A C46A H46A 118.7 . . ? 
C45A C46A H46A 118.7 . . ? 
C46A C47A C48A 116(5) . . ? 
C46A C47A H47A 122.0 . . ? 
C48A C47A H47A 122.0 . . ? 
C43 C48A C47A 118(5) . . ? 
C43 C48A H48A 121.1 . . ? 
C47A C48A H48A 121.1 . . ? 
 
_diffrn_measured_fraction_theta_max    0.992 
_diffrn_reflns_theta_full              27.48 
_diffrn_measured_fraction_theta_full   0.992 
_refine_diff_density_max    0.661 
_refine_diff_density_min   -0.605 
_refine_diff_density_rms    0.077 


#===END
